# Beyond winglets: evolution of flight-related morphology in stick insects (Phasmatodea)

Yu Zeng<sup>1,2†</sup>, Sehoon Park<sup>1</sup>, Camille Gonzales<sup>1</sup>, Faszly Rahim<sup>3,4</sup>, and Robert Dudley<sup>1,5</sup>

<sup>1</sup>Department of Integrative Biology, University of California, Berkeley, CA 94720, USA

<sup>2</sup>Schmid College of Science and Technology, Chapman University, Orange, CA 92866, USA

<sup>3</sup>Centre for Insect Systematics (CIS), Universiti Kebangsaan Malaysia,  
43600 Bangi, Selangor, Malaysia

<sup>4</sup>Islamic Science Institute (ISI), Universiti Sains Islam Malaysia,  
71800 Bandar Baru Nilai, Negeri Sembilan, Malaysia

<sup>5</sup>Smithsonian Tropical Research Institute, Balboa, Republic of Panama

†Corresponding author: dreavoniz@berkeley.edu

**Acknowledgments:** We thank Francis Seow-Choen for helping with field work and commenting on stick insect natural history. We also thank David Wake, Paul Brock, Kipling Will, Rosie Gillespie and George Roderick for comments, and thank Faye Pon, Joan Chen, Stephanie Yom, Xiaolin Chen, Ho-Yeon Han, Ian Abercrombie, Yamai Shi-Fu Huang, Lin Cao, Azuan Aziz, and Juhaida Harun for help with data collection. We further thank the Forestry Department of Pahang, Malaysia, for permission to collect insects. This research was supported by National Science Foundation (DDIG-1110855), the Museum of Vertebrate Zoology and the Department of Integrative Biology at UC-Berkeley, the Undergraduate Research Apprentice Program (URAP) of UC-Berkeley, the Society for Integrative and Comparative Biology (SICB), and the Ministry of Higher Education Malaysia [FRGS/1/2012/SG03/UKM/03/1(STWN)].

**Author contributions:** Y.Z. devised experiments and performed the majority of data collection and analyses. S.P. and C.G. contributed to data collection and morphological analyses, and F.H. contributed to field data collection. Y.Z. and R.D. contributed to writing of the manuscript.

**Conflicts of Interests:** The authors declare no conflicts of interests.

# Beyond winglets: evolution of flight-related morphology in stick insects (Phasmatodea)

## Abstract

The first winged insects evolved from a wingless ancestor, but details of the transition from wingless to winged morphology remains unclear. Studying extant pterygotes undergoing secondary flight loss may help to understand such a transition in reverse temporal sequence. Stick insects (Order Phasmatodea) exhibit differently sized partial wings and frequent transitions between fully-winged and wingless forms, along with robust near-isometric scaling of wing area and body mass, with a correspondingly wide range of wing loading variation. To address how other flight-related morphological traits (including the flight apparatus and body-leg system) might correlate with wing size evolution, we studied wing and body shape in fifty different phasmid taxa over a wing loading range from 1.4 – 2300  $\text{Nm}^{-2}$ . Wing shape evolution showed sex-specific trends, with a linear reduction of aspect ratio over the wing loading range of 2.2 – 23  $\text{Nm}^{-2}$  in female insects, but a positive correlation with wing size in the males. Also, with reduced wing size and increased wing loading, wing venation exhibited structural reconfiguration across the wing loading range 6 – 25  $\text{Nm}^{-2}$ , and the wingbase shifted from the anterior half of the body to nearer the center of body mass. Nonetheless, masses of the wings and flight muscle, and the shape of the body-leg system, were predominately predicted by specific allometric scaling relationships and not by wing loading. Such morphological reorganization relative to wing size evolution likely reflects interplay between selection on flight performance and on wing and body size within different ecological contexts. These results reveal complex reconfiguration of flight-related traits on the wing loading landscape during wing and body size evolution in phasmids.

## Keywords

allometry, flightlessness, legs, sexual dimorphism, venation, wings

## 1. Introduction

Deriving from a single phylogenetic origin, pterygotes and their wings continue to exhibit rich dynamics on evolutionary timescales. The ancestors of winged insects were small terrestrial hexapods possessing only protowings (see Kukalová-Peck, 1983; Ellington, 1991; Dudley, 2000). And although the initial process of flight gain remains unclear, the earliest winged insects must have undergone substantial increase in wing size under selection. Once equipped with substantial wings, numerous pterygote lineages have then secondarily undergone partial or complete wing loss; ~5% of the extant pterygote fauna is flightless (Roff, 1994). The main reason underlying secondary flight reduction is likely the energetic cost for developing and maintaining the flight apparatus (e.g., wings and associated musculature), along with high energy expenditure during flight. Partial reduction or complete loss of wings has been associated with various ecological conditions, including developmental tradeoffs, enhanced female fecundity, and reduced demand for aerial mobility in montane habitats (Roff, 1994; Mani, 2013).

Partial wings presumably possess reduced aerodynamic capabilities (e.g., force generation) but may still serve locomotor functions within specific behavioral contexts, which has only been reported in derived taxa (e.g., water surface skimming in stoneflies; Marden, 2003). More often, size-reduced wings serve secondarily derived non-aerodynamic functions, such as use in protection, stridulation, and startle displays (see Dudley, 2000). Notably, one understudied behavioral context is controlled aerial descent (including parachuting and gliding). Empirical analyses suggest that flapping flight by pterygotes may have evolved from gliding in apterygotes via a series of intermediate morphologies with partial wings (Dudley et al., 2007; Dudley and Yanoviak, 2011). Within such a context, partial wings on a stably falling insect will interact with an upward flow field, and thus would be subject to high aerodynamic loading (Zeng et al., 2017).

A systematic examination of the transition in flight-related morphology between winged and wingless forms may help to understand the biomechanical origins of insect flight. Such an investigation may be approached at two levels. First, it is important to address features of the flight apparatus, including the wings and flight muscle, with respect to variation in relative wing size. For example, the shape and flexibility of wings are biomechanically coupled with the aerodynamics of flapping wings and body movements during flight. For fully winged insects, wing shape is often sexually dimorphic and may vary with species-specific ecology (e.g., Le Roy et al., 2019; Perrard et al., 2014); greater variation may be expected if the insects undergo drastic loss of flight capability. Also, because partial wings may interact with air flow differently than do full-sized flapping wings, the pterothoracic morphology and flight musculature may be reconfigured to power specific wing motions. Second, it is important to address the morphology of the body-leg system. The body-leg system is conventionally treated as the ‘airframe’ with legs omitted, but the legs are fully extended in many flying insects and thus should be incorporated aerodynamically. The body-leg system influences flight via both aerodynamic and inertial forces, which are determined by the size, shape, and mass of individual segments and their joint configurations (see Dudley, 2000). For species with partial wings, the body-leg system may serve as the dominant aerodynamic surface, assisting force production or stability via postural control and movements (Thomas and Taylor, 2001).

The stick insects (Order Phasmatodea) represent one of the few pterygote clades that have been analyzed for wing size variation within a context relevant to flight biomechanics. These insects are herbivorous and generally inhabit terrestrial vegetation, including tall tree canopies. Extant phasmids exhibit vestigial forewings and variably-sized hindwings (denoted the ‘wings’ hereafter), ranging from fully-sized to almost absent or vestigial wings. The processes of wing reduction and flight transition in phasmids remain largely understudied, despite the hypothesis that relaxed selection for flight (i.e., aerodynamic utility) underpins short-winged or wingless species within an arboreal context (Zeng et al., 2020). A recent study showed ascending flight in leaf insects, a group of leaf-mimicking phasmids (Boisseau et al., 2022).

82 Previous work revealed robust near-isometric scaling laws of body mass and wing area in stick  
83 insects, which allows for a relatively confident prediction of wing loading ( $p_w$ ; the average pressure  
84 exerted on air by the wings) using body length ( $L$ ) and the relative wing size ( $Q$ ; i.e., the ratio of absolute  
85 wing length  $L_w$  to  $L$ ). The empirical prediction for wing loading is a surface defined by  $L$  and  $Q$  (the  
86 ‘wing loading landscape’), which enables analysis of trait variation with respect to different stages of  
87 flight loss (**Fig. 1A**; Zeng et al., 2020). By analyzing species richness of different flight morphologies,  
88 this study revealed two ‘adaptive peaks’ among winged stick insects: one was associated with long-  
89 winged species with a relative wing size  $Q \approx 0.7$ , and the other with species with miniaturized wings of  $Q$   
90  $< 0.3$  used for non-aerodynamic functions (e.g., visual display). These two peaks were separated by an  
91 ‘adaptive valley’ of short-winged species with  $Q \approx 0.3$  and  $p_w \approx 10 \text{ Nm}^{-2}$ . The morphological space  
92 characterized by  $p_w < \sim 10 \text{ Nm}^{-2}$  thus characterizes a continuous reduction of flight capability as wing  
93 loading increases. Furthermore,  $p_w$ ,  $L$ , and  $Q$  are evolutionarily coupled but each may subject to different  
94 selective pressures. The most general pattern was an inverse correlation between  $Q$  and  $L$  (i.e., smaller  
95 body with larger wings, or the converse) in both female and male stick insects (**Fig. 1B,C**). Selection for  
96 dispersal efficiency has probably favored lower wing loading in males, whereas selection for fecundity  
97 has likely driven body size increase and wing reduction in females (see Zeng et al., 2020).

98 Here, we examine the evolution of flight-related morphology beyond these correlations between  
99  $L$  and  $Q$ . Because there was no prior study on the flight of partial-winged insects, we derive our  
100 hypotheses based on predictions from controlled descent of wingless insects (Zeng et al., 2017). We  
101 hypothesize that: (i) with increasing wing loading, taxa would exhibit changes in wing morphology (i.e.,  
102 both shape and venation) to offset increased aerodynamic loading; and (ii) the body-leg system may be  
103 reconfigured to benefit stability. We first examined the scaling of wing shape, venational pattern of  
104 wings, and masses of wings and flight musculature with respect to  $p_w$ ,  $L$ ,  $Q$ , and the absolute wing length  
105  $L_w (= LQ)$ . Specifically, we adopted simplified geometric models and performed sensitivity analyses to  
106 identify potential variation associated with the aforementioned ‘adaptive valley’ near  $p_w \sim 10 \text{ Nm}^{-2}$ . We  
107 also examined mass distribution, projected planform area, and the longitudinal position of relevant joints  
108 for the body-leg system.

109 We assessed two phylogenetic levels within the Phasmatodea. The first analyzed interspecific  
110 variation with a pool of 50 taxa composed of both males and females from major clades, and covering a  
111 wing loading range of  $1.4 - 2300 \text{ Nm}^{-2}$  (**Fig. 1B,C**; **SI Fig. S1A**). At the sub-species level, we examined  
112 the tropical stick insect *Asceles tanarata* Brock, 1999. *A. tanarata* represents one of the few well-  
113 documented cases of discrete intraspecific variation in flight-related morphology across an environmental  
114 gradient. *A. tanarata* is native to the Malay Peninsula (Brock, 1999; Seow-Choen, 2000), and consists of  
115 three subspecies distributed along an altitudinal gradient from  $\sim 50 \text{ m}$  to  $\sim 1600 \text{ m}$ , with a wing reduction  
116 ranging from fully developed to miniaturized wings, along with substantial body size reduction (**Fig.**  
117 **1D,E**). This species group exhibits a unique coupled reduction in wing and body size, which is an outlier  
118 for stick insects considering the more general inverse correlation between wing and body sizes (**Fig.**  
119 **1B,C**). For simplicity, the six study morphs are coded numerically in order of increasing altitudinal  
120 occurrence (i.e., *A. tanarata singapura*, At1; *A. tanarata amplior*, At2; *A. tanarata tanarata*, At3), and  
121 with the suffixes ‘f’ and ‘m’ denoting ‘female’ and ‘male’, respectively.

122

## 123 2. Materials and methods

### 124 2.1 Insect collection and husbandry

125 We sampled 56 taxa (26 females and 30 males from 47 species;  $0.2 < Q < 0.85$ ) from field-captured or  
126 captive-reared insects (**SI Data S1**). Analysis of wing and body morphometrics followed Ellington  
127 (1984). For the *A. tanarata* group, insects were collected on host plants (*Macaranga* spp. and  
128 *Melastoma* spp.) at type localities (**Fig. 1E**) during night expeditions (August 2008, July 2010 and  
129 August 2011). Before experimental treatments, individual insects were maintained in large plastic  
130 containers with fresh leaves from host plants, and were held in an air-conditioned room at  $22 - 26$  °C.

131

### 132 2.2 Morphometrics

133 To analyze wing morphology, we took images of fully unfolded hind wings using a digital camera  
134 (Olympus E-3) ( $N = 34$  female taxa;  $N = 36$  male taxa). Insects were anesthetized either with a 5-min  
135 cold treatment ( $0-4$  °C) or a 5-min  $\text{CO}_2$  treatment. Two-dimensional images of wings were then extracted  
136 using Photoshop (Adobe Inc., USA), and were measured using ImageJ (Abràmoff et al., 2004) for lengths  
137 ( $L_w$ ) and areas ( $A_w$ ) (**SI Fig. S1D**). Wing shape descriptions followed previous methods (Ellington, 1984).  
138 Relative wing size was calculated as  $Q = \frac{L_w}{L}$ , where  $L_w$  is wing length and  $L$  is body length. Wing  
139 loading was calculated as  $p_w = \frac{mg}{2A_w}$ , where  $m$  is insect mass,  $g$  is gravitational acceleration and  $A_w$  is the  
140 wing area (see also Zeng et al., 2020).

141 Identification of primary radial veins followed Ragge (1955), where the anterior anal (AA) and  
142 posterior anal (PA) veins were identified using associations with axillary sclerites at wingbase (**SI Fig.**  
143 **S1B**). The variation of the number of AA veins ( $N_{AA}$ ) with respect to  $p_w$  was fitted with inverse sigmoid  
144 curves using a Four Parameter Logistic Regression (R package ‘dr4pl’; Ritz et al., 2015) as:

$$145 \quad n_{AA} = \frac{a - d}{1 + \left(\frac{p_w}{c}\right)^b} + d$$

146 (1)

147 where  $a$ ,  $b$ ,  $c$ , and  $d$  are the four fitting coefficients.

148 Body sections and legs were treated as a system of cylinders, including the anterior body section  
149 (BS1) and posterior body section (BS2) as connected at the median joint (i.e., the 1<sup>st</sup> abdominal tergum;  
150 Bragg, 1997), and the six legs (see **SI Fig. S1D**). To obtain projected planforms of body and leg  
151 segments, anesthetized insects were laid dorsoventrally on a flat surface with their legs fully extended for  
152 digital imaging. Two-dimensional images of all body parts were then extracted using Photoshop (Adobe  
153 Inc., USA), and were measured using ImageJ (Abràmoff et al., 2004) for lengths and planform areas.

154

### 155 2.3 Mass of flight muscle

156 Flight muscle mass was measured in a total of 16 different flight morphs (6 females and 4 males from six  
157 species reared in the laboratory and 3 females and 3 males of the *Asceles tanarata* species group collected  
158 in the field), covering a relative wing size range from  $0 - 0.78$ , with 2 – 6 individuals per flight morph  
159 (see **SI Data S1**). We first cut off the metathorax from euthanized insects and removed muscles  
160 associated with hindlegs and the median joint. We then indirectly measured the mass of flight muscles  
161 following NaOH digestion of soft tissue, with duration of chemical treatment adjusted according to the  
162 size of wings ( $Q > 0.5$ , 12 hr;  $0.3 < Q < 0.5$ , 2 hr;  $Q < 0.3$ , 30 min).

163

## 164 2.4 Mass distribution of body-leg system

165 The masses of two body sections and the legs were measured from deep-frozen specimens in **20** taxa (10  
166 females and 10 males) from **12** species either reared in the laboratory or collected in the field (**SI Data**  
167 **S1**). Each body part was cut from frozen specimens and measured with a portable electronic balance (PP-  
168 2060D, Acculab; accuracy of 0.001 g and linearity of  $\pm 0.004$  g) in the field or with an electronic balance  
169 (R200D, Sartorius AG, Germany) in the lab. The center of mass (COM) of the body (i.e., of the head,  
170 thorax, and abdomen) was estimated from images of frozen specimens (with legs removed) balanced on a  
171 vertically oriented razor blade (**SI Fig. S1E**). Wing mass was measured from freshly euthanized  
172 specimens. Forewings were highly reduced in size (i.e.,  $< 5\%$   $A_w$  and  $< 0.1\%$  mass in all sampled taxa)  
173 and were thus omitted.

174 The total leg mass ranged from 9% – 24% of body mass (see **SI Data S1**) and was included in  
175 corresponding body sections. Based on observations of leg posture in flight (**SI Fig. S1D**), the mass of  
176 fore- and mid-legs was included in the anterior section, and the mass of the hind-legs was included in the  
177 posterior section. The longitudinal position of the COM relative to the anterior end was calculated as:

$$178 P_{COM} = \frac{0.5L_1 + (L_1 + 0.5L_2)r_m}{1 + r_m}$$

179 (2)

180 where  $L$  is the length of a body section, subscripts 1 and 2 denote the anterior and posterior sections,  
181 respectively, and  $r_m (= m_2/m_1)$  is the mass ratio of the posterior to the anterior section. The moment of  
182 inertia (MOI) of the abdomen about the insect's COM was calculated as  $I = m_2r^2$ , where  $r$  is the  
183 distance from  $m_2$  to the COM.

## 184 2.5 Statistical analyses

186 For phylogenetically justified correlations, we used a molecular phylogeny that includes all three  
187 subspecies of the *A. tanarata* from a previous study (**SI Fig. S1A**; Zeng et al., 2020). The phylogenetic  
188 signals for wing and body size were significant. For the species lacking molecular data, we added them as  
189 polytomous tips to the node representing the latest common ancestor on the tree. We then generated 100  
190 random trees with randomly resolved polytomous tips. Each new node was added using the function  
191 ‘multi2di’ (package ‘ape’; Paradis et al. 2004), and was given a branch length that was randomly drawn  
192 from a normal distribution of branch lengths with a mean of  $0.1 \times$  mean branch lengths of the original tree,  
193 and a standard deviation of  $0.01 \times$  the standard deviation of branch lengths from the original tree. We  
194 then conducted phylogenetic generalized least square (PGLS) analyses (package ‘caper’; Orme et al.,  
195 2013) and ordinary generalized least square analyses (GLS). For each correlation, we ran PGLS on all  
196 random trees and summarized the results ( $ML\lambda$  and coefficients), which were then compared with those  
197 from GLS tests conducted without reference to the phylogeny (i.e.,  $\lambda = 0$ ).

198 For correlations of a given trait with respect to wing loading, we conducted sensitivity analyses  
199 using a series of generalized linear regressions to identify the potential  $p_w$  value corresponding to a  
200 critical transition in the trait. With custom-written scripts in R, we first generated a series of  $p_w$  ranges  
201 with different upper limits (denoted  $p_{w(max)}$ ). We then examined the significance of correlations (i.e.,  
202 standard errors and  $P$ -values of slope coefficients) with respect to  $p_w$ .

203  
204

### 205 3. Results

#### 206 3.1 Evolution of wing shape

207 Among all examined taxa, wing aspect ratio (AR) varied between 1.2 and 2.7 (male, 1.6 – 2.6; female, 1.2  
208 – 2.7). Wings of high AR ( $> 2$ ) were generally found in insects with wing loading  $< 10 \text{ Nm}^{-2}$ , whereas  
209 low AR ( $< 1.5$ ) was associated with female wings in the  $p_w$  range of  $5 - 10 \text{ Nm}^{-2}$  (**Fig. 2A**). The  
210 variational pattern of AR was specific to each sex. Wing AR was not correlated with body size in either  
211 sex (**SI Table S1**). On one hand, female wing AR exhibited a reduction with increasing  $p_w$ , as shown by a  
212 progressively rounder wing shape (**Fig. 2A**). Based on sensitivity analysis, this reduction corresponds to  
213 the lower limit of  $p_w \sim 2.2 \text{ Nm}^{-2}$ , and to an upper limit of  $\sim 23 \text{ Nm}^{-2}$  (**Fig. 2B**). On the other hand, male  
214 wing AR varied between 1.6 – 2.3 and was positively correlated with absolute wing length  $L_w$  (**Fig. 2C**).  
215 These evolutionary patterns in wing shape suggest significant selection for wing aerodynamic function,  
216 potentially coupled with a sex-specific body plan and flight biomechanics (see **Discussion**).  
217

#### 218 3.2 Evolution of wing venation

219 The first general pattern we noticed was that the number of primary radial veins was coupled with wing  
220 size, as demonstrated with exemplar wings (**Fig. 3A**). Note that female insects had more radial veins than  
221 the males with same wing loading, corresponding to a relatively greater mass allometry exponent (see  
222 Zeng et al., 2020). With PGLS analyses, we found the total number of radial veins ( $N_V$ ) was more  
223 significantly correlated with wing loading and with relative wing size  $Q$  than with absolute wing size  $L_w$   
224 (**Fig. 3B**; **SI Table S1**). With a structural design resembling a ‘Chinese fan’, wing length mainly equaled  
225 the length of elytrized costal veins and was also close to the length of the longest (and most costal) radial  
226 veins (AA1); it thus was not coupled with the number of radial veins, duplication of which mainly  
227 determine wing shape and chord size. As expected, the scaling exponent of  $N_V$  with  $L_w$  was only  $\sim 0.3$ .

228 The second general pattern was that the number of anterior anal (AA) veins was relatively  
229 conserved, whereas that of the posterior anal (PA) veins decreased more sharply with reduced wing size.  
230 Correspondingly, the AA veins supported the membrane region adjacent to the elytrized costal edge,  
231 whereas the PA veins supported the more posterior anal region. The number of PA veins ( $N_{PA}$ ) varied  
232 between 2 – 14, exhibiting a linear correlation with  $p_w$  (**Fig. 3C**). The number of AA veins ( $N_{AA}$ ) only  
233 varied between 5 – 7, which were well fitted with inverse sigmoid curves using Four Parameter Logistic  
234 Regression models and which showed sharp reductions at  $p_w \approx 10 \text{ Nm}^{-2}$ . (**Fig. 3D**). Treating the midpoint  
235  $N_{AA} = 6$  as a critical transition, the regression models predicted the corresponding critical  $p_w$  values to be  
236  $10^{0.75} \text{ Nm}^{-2}$  (i.e.,  $5.8 \text{ Nm}^{-2}$ ; confidence interval of  $4.4 - 8.1 \text{ Nm}^{-2}$ ) for males and  $10^{1.3} \text{ Nm}^{-2}$  (i.e.,  $18.4 \text{ Nm}^{-2}$ ;  
237 confidence interval  $\sim 0$  due to small sample size of  $N_{AA} = 6$ ) in females (**SI Data S1**). With a prediction  
238 for the function of two vein groups, and especially for structural support in the downstroke by AA veins,  
239 this pattern of vein reorganization and reduction is likely coupled with changes in wing aerodynamics at  
240 low to medium-high values of wing loading (see **Discussion**).

241 Furthermore, as inter-vein angles are relatively conserved (e.g.,  $6.8^\circ - 8.8^\circ$  between radial veins in  
242 *A. tanarata*; see **SI Fig. S3D**), the gap size (or transverse distance) between adjacent veins should  
243 increase toward the wing margin, with greater distances in longer wings. Probably so as to strengthen the  
244 membrane between primary radial veins, wings of stick insect possess intercalary veins at the wing  
245 margin (**Fig. 3E**), a trait found in other orthopteroid insects. Here, we found two levels of intercalary  
246 veins (namely primary and secondary) in long wings with  $L_w > 20 \text{ mm}$ , and only one level in short wings  
247 with  $L_w < 20 \text{ mm}$  (**Fig. 3F**).

248 Overall, these trends indicate (i), a reorganization of primary radial veins (AA and PA) along the  
249 gradients of  $Q$  and  $p_w$ , and (ii) a loss of intercalary veins with decreasing  $L_w$ , which is coupled with  
250 conservation of inter-vein angle. Lastly, we highlight that, in forms with high wing loading, wings may

251 exhibit significant functional modification or loss of vein components, whereas those with relatively  
252 complete venation may preserve aerodynamic capacity (**Fig. 3F**).  
253

### 254 **3.3. Masses of wings and flight musculature**

255 Among nine sampled species ( $Q$  between 0 – 0.8;  $L_w$  between 0 – 77 mm;  $L$  between 36 – 160 mm), the  
256 mass of a single wing ( $m_w$ ) varied between 0.4 mg and 0.16 g. The scaling of wing mass with wing length  
257 was specific to each sex. For long wings with  $L_w > 5$  cm, wing mass was about 0.1 g in both sexes. The  
258 scaling exponent of  $m_w$  was 2.2 and 1.2 in male and female insects, respectively (**Fig. 4A**).  
259 Correspondingly with reduced  $L_w$ , intersexual differences in  $m_w$  increased, with a lower  $m_w$  in wings of  
260 male insects.

261 Next, relative masses of both wings and flight musculature were positively correlated with  
262 relative wing size ( $Q$ ), but not with body size ( $L$ ) or wing loading ( $p_w$ ) (**SI Table S1**), suggesting coupling  
263 with wing size at anatomical and developmental levels. The relative mass of wings ( $m_w'$ ) reached a  
264 maximum of 6% in the longest wings ( $Q = 0.8$ ), and dropped to  $< 2\%$  in short wings with  $Q < 0.4$  (**Fig.**  
265 **4B**). The power-law exponent of  $m_w'$  to  $Q$  in male insects was 0.1, which was twice that for female  
266 insects. The relative mass of flight muscle reached a maximum of 14% and also showed male-biased  
267 scaling, with male insects having a greater power-law exponent that was twice as large as that of the  
268 female insects (**Fig. 4C**).

269 We did not find an overall correlation between leg mass and wing size among all sampled insects.  
270 However, we found for the *A. tanarata* group that wing reduction was associated with increase in leg  
271 mass, possibly due to a tradeoff in energy allocation in the highland environment (see **SI Fig. S2B**).  
272

### 273 **3.4 Evolution of the body-leg system**

274 Longitudinal mass distribution was fairly conserved in the two sexes, albeit with females having heavier  
275 abdomens. Using a two-section model for the body (**SI Fig. S1D**), the relative mass of the anterior body  
276 section (BS1) averaged 36.7% and 39.7% in females and males, respectively. The relative mass of  
277 posterior body section (BS2) averaged 48.2% and 33.5% in females and males, respectively. The relative  
278 mass of neither section was correlated with  $L$ ,  $Q$  or  $p_w$  (see **SI Table S1**). Correspondingly, the  
279 longitudinal position of the center of mass (COM) was also conserved, lying at about 50% along the body  
280 length from the anterior end of head (hereafter abbreviated as 0.50  $L$ ; range 0.47 – 0.54  $L$ ) in females, and  
281 0.44  $L$  (range 0.41 – 0.46  $L$ ) in males, in both cases being generally located within 0.08  $L$  near the median  
282 joint (**Fig. 5A**). The longitudinal positions of BS1, BS2 and COM were not correlated with  $L$ ,  $Q$ , or  $p_w$   
283 (see **SI Table S1**), except for a significant reduction in males of the mass of BS2 with increasing  $p_w$ .  
284 Wing mass was  $< 1\%$  of body mass in all insects and had a negligible influence on the position of COM.

285 Total leg mass was generally conserved and not correlated with  $L$ ,  $Q$ , or  $p_w$ . However, an increase  
286 in the relative mass of legs was correlated with body miniaturization in the *A. tanarata* group, suggesting  
287 a specific case of developmental tradeoffs (see **SI Section A**).

288 With increased wing loading, both the wing base and the median joint shifted from the anterior  
289 half of body to near the longitudinal center of body. The wing base, located at  $\sim 24\%$  of body length  $L$   
290 from the anterior end of head in insects with the lowest wing loadings, shifted posteriorly to  $\sim 0.40 L$  (**Fig.**  
291 **5A**). The median joint also shifted posteriorly, from  $\sim 0.40 L$  to  $\sim 0.48 L$  in males, and from  $\sim 0.40 L$  to  
292  $\sim 0.50 L$  in females. As both joints link to the metathoracic segment, these shifts resulted in a relative  
293 elongation of the mesothoracic segment and longitudinal compression of the abdominal section (**Fig. 5B**).  
294 Consequentially, distance between the wingbase and COM ( $d_{wb-COM}$ ) was reduced to  $\sim 0.15 L$  in both  
295 sexes (**Fig. 5C**). Similarly, the distance from the median joint to COM was reduced to  $\sim 0.10 L$  in both  
296 sexes. The moment of inertia (MOI) of abdomen exhibited no significant variation with respect to wing



297 loading, despite the reduction of the BS2 mass in males (**Fig. 5D**). Lastly, the projected planform areas of  
298 body and legs followed geometrical scaling and were only correlated with L, with power-law exponents  
299 of  $\sim 2$  (**Fig. 5E,F**).

300

301

## 302 4. Discussion

303 These results demonstrate systematic morphological reorganization of the flight apparatus and body plan  
304 during evolutionary loss of flight capacity in phasmids. Whereas a variety of selective scenarios may  
305 underlie such changes, we can identify the principal intercorrelations with respect to evolutionary changes  
306 in wing loading (**Fig. 6**). Wing morphology (e.g., wing shape and venation) exhibited stepwise variation  
307 in accordance with a critical wing loading value of  $\sim 10 \text{ Nm}^{-2}$ , whereas most other morphological features  
308 were either significantly correlated with  $p_w$  and  $Q$ , or were predominately predicted by allometric scaling  
309 with body length.

310

### 311 4.1 Structural reconfiguration in partial wings

312 Considering variation in phasmid wing shape with respect to wing loading (**Fig. 2**), the aspect ratio (AR)  
313 range of 1.2 – 2.6 was somewhat low compared that in other flying insects (1.5 – 5.8; Bhat et al., 2019)  
314 but probably exceeds other clades in variability. In male stick insects, the positive correlation between  
315 AR and wing length  $L_w$  is likely an adaptation for enhanced aerodynamic efficiency (Kruyt et al., 2015),  
316 in accordance with the interpretation that male stick insects are under selection for dispersal capability  
317 (Zeng et al., 2020). In female stick insects, the reduction of wing AR with from low to medium-high  $p_w$   
318 may indicate selection for non-flapping aerodynamic functions. Considering that these wings are used in  
319 various gliding behaviors (pers. obs., YZ), a low AR wing may help in drag production at high angles of  
320 attack (Ennos, 1989; Torres and Muller, 2004; Sunata et al., 2002). Why was this reduction only found in  
321 female insects? Females have a more posterior COM, and low AR wings may result in a more posterior  
322 center of aerodynamic pressure, reducing the static margin for stability (see below). Also, females are  
323 heavier than males and may have a greater demand for vertical force generation when parachuting or  
324 gliding. With little known about aerodynamics of such partial wings with low AR and operating at high  
325  $p_w$ , kinematic data (e.g., flow fields, wing flapping kinematics, and wing deformation) along with force  
326 analysis would be necessary to further address functional significance of these differences.

327 In contrast to the wings of close relatives such as orthopteran and mantodean insects (Smart, 1953;  
328 Herbert et al., 2000), phasmid wings feature a narrow, elytrized costal edge that covers their slender  
329 abdomen, and the radially organized veins support the majority of wing membrane, allowing it to fold in  
330 fanlike fashion. The variation in the radial veins follows two trends: (1) stepwise reduction of functional  
331 modules along with the gradient in  $Q$  and  $p_w$ , and (2) loss of hierarchical levels with reducing wing size  
332  $L_w$  (**Fig. 3F**).

333 At the whole-wing level, reduction of the number of veins with decreasing  $Q$  is likely a case of  
334 truncated development. For the AA veins, which are directly associated with wing depressor muscles (**SI**  
335 **Fig. S1C**), reduction at medium-high  $p_w$  is likely coupled with a reduction in downstroke capability. The  
336 PP veins appear as a modularized component, which contributes to a large part of the variation in vein  
337 number and wing area (**Fig. 3A**). This variability in number may be regulated as developmental  
338 duplication, and could contribute to relatively rapid evolution of wing gain or reduction in phasmids  
339 (Zeng et al., 2020; Bank and Bradler, 2022). Although not analyzed here, miniaturized wings of  $Q < 0.3$   
340 seem to possess high variability in design and functionality (**Fig. 3F**). Over this high- $p_w$  regime,  
341 maintenance of the complete wing membrane (such as in At3f and At3m; **SI Fig. S3A**) suggests reduced  
342 yet non-trivial aerodynamic utility.

343 Lastly, both wing shape and venation of partial wings may contribute to wing deformation (e.g.,  
344 camber formation) during aerial descent (pers. obs., YZ). For the next step, analysis of wing flapping  
345 kinematics is necessary to address the function of different vein groups, and to biomechanically  
346 understand phasmid wing evolution.

347

## 348 **4.2 Scaling of wing inertia and flight muscle**

349 The positive correlation of wing mass with wing size shows that wings are not isometrically condensed as  
350 their size is reduced, or that less cuticle is put into their construction. With mean scaling exponents of 1.2  
351 and 2.2 (**Fig. 4A**), wing mass scaling lies in between simple models assuming uniform thickness  
352 (exponent of 1) and isometric scaling (exponent of 3), suggesting that thickness increases along with wing  
353 size. Convergence of mass in long wings from both sexes (**Fig. 4B**) is in accordance with the high AR of  
354 long wings in both sexes. For shorter wings, those of female insects had greater mass (**Fig. 4A**), which  
355 may be associated with wider elytrized costal edges (**SI Fig. S3**). At the whole-insect level, relative  
356 masses of wings and flight musculature can be reliably predicted using  $Q$  (**Fig. 4B,C**).

357 Male insects had relatively greater wing and flight muscle, with the wings representing ~6% of  
358 whole-insect mass. Also, linear reduction in the relative mass of flight muscle suggests a close coupling  
359 with wing size. Reduction in flight muscle mass may be associated with loss and reconfiguration of  
360 different muscle groups, as well as with an overall reduction in wing flapping capability. Together, these  
361 data suggest a reduction of wing inertia and flapping capability as  $Q$  decreases, which predicts less  
362 effective force production during flapping.

363

## 364 **4.3 Changes in the body-leg system during flight loss**

365 For the body-leg system, only the longitudinal positions of pterothoracic segments and associated joints  
366 exhibited significant variation with respect to  $p_w$  and  $Q$ . The  $p_w$ -invariant parameters (including COM  
367 position, masses of BS1 and legs, and projected planform area of body and legs) were conserved and  
368 followed near-isometric scaling. This result suggests limited influence of selection on flight-related  
369 functions; however, aerodynamic and inertial roles of legs and abdomen can be directly regulated via  
370 movements and postural control in flight. The role of body-leg postural control in flight performed with  
371 variously sized wings could be addressed in future research.

372 The posterior shift of pterothoracic segments may help to maintain stability during descending  
373 flights performed with partial wings. Passively stable aerodynamic configurations are achieved through  
374 the moment balance between forces produced on wings and on the body-leg system (Zeng et al. 2017).  
375 Critical for such a configuration is a statically stable posture of the insect (including wings and body-leg  
376 sections) with the center of pressure located vertically above the COM (if vertically parachuting), or  
377 posterior to the COM (if gliding with a forward component of velocity). In both cases, partial wings  
378 would generate vertical forces with reduced or no flapping. Also, the demand for abdominal oscillation  
379 (**SI Fig. S1D**) is likely reduced or lost altogether as flight diminishes, because wing motions are either not  
380 oscillatory or are doing so only in small amplitude.

381 The posteriorward shift of the pterothorax and a corresponding reduction in wingbase-COM  
382 distance (**Fig. 5A-C**) can effectively reduce the magnitude of wing-induced moments, compensating for  
383 instability induced by wing forces. It may also shift the aerodynamic center more posteriorly and reduce  
384 the static margin (which is negative when the center of pressure is posterior to the COM), yielding better  
385 passive stability. In the direction of flight gain, a positive static margin may be necessary for flapping  
386 flight in fully-winged insects. So far, kinematics of wing flapping and flight performance have only been  
387 documented in a leaf insect (Boisseau et al., 2022). These predictions need to be confirmed using actual  
388 body-leg postures and body kinematics, along with stability analysis, from flight of phasmids with  
389 various sized wings.

390

391

392

## 393 References

- 394 **Abràmoff, M. D., Magalhães, P. J. and Ram, S.** (2004). Image processing with ImageJ. *Biophotonics*  
395 *international* **11**, 36-43.
- 396 **Boisseau, R. P., Büscher, T. H., Klawitter, L. J., Gorb, S. N., Emlen, D. J. and Tobalske, B. W.** (2022).  
397 Multi-modal locomotor costs favor smaller males in a sexually dimorphic leaf-mimicking insect. *BMC*  
398 *Ecology and Evolution* **22**, 1-18.
- 399 **Bragg, P. E.** (1997). A glossary of terms used to describe phasmids. *Phasmid Studies* **6**, 24-33.
- 400 **Brock, P. D.** (1999). *Stick and leaf insects of Peninsular Malaysia and Singapore*, Malaysian Nature Society.
- 401 **Dudley, R.** (2000). *The biomechanics of insect flight: form, function, evolution*, Princeton Univ Pr.
- 402 **Dudley, R., Byrnes, G., Yanoviak, S. P., Borrell, B., Brown, R. M. and McGuire, J. A.** (2007). Gliding and  
403 the Functional Origins of Flight: Biomechanical Novelty or Necessity? *Annual Review of Ecology, Evolution,*  
404 *and Systematics* **38**, 179-201.
- 405 **Dudley, R. and Yanoviak, S. P.** (2011). Animal aloft: the origins of aerial behavior and flight. *Integr Comp*  
406 *Biol* **51**, 926-936.
- 407 **Ellington, C. P.** (1991). Aerodynamics and the origin of insect flight. *Adv. Insect Physiol* **23**, 171-210.
- 408 **Ennos, A. R.** (1989). The effect of size on the optimal shapes of gliding insects and seeds. *Journal of*  
409 *Zoology* **219**, 61-69.
- 410 **Herbert, R. C., Young, P. G., Smith, C. W., Wootton, R. J. and Evans, K. E.** (2000). The hind wing of the  
411 desert locust (*Schistocerca gregaria* Forskal). III. A finite element analysis of a deployable structure. *Journal*  
412 *of Experimental Biology* **203**, 2945-2955.
- 413 **Kruyt, J. W., Van Heijst, G. F., Altshuler, D. L. and Lentink, D.** (2015). Power reduction and the radial  
414 limit of stall delay in revolving wings of different aspect ratio. *Journal of the Royal Society Interface* **12**,  
415 20150051.
- 416 **Kukalová-Peck, J.** (1983). Origin of the insect wing and wing articulation from the arthropodan leg. *Can J*  
417 *Zool* **61**, 1618-1669.
- 418 **Le Roy, C., Debat, V. and Llaurens, V.** (2019). Adaptive evolution of butterfly wing shape: from  
419 morphology to behaviour. *Biological Reviews* **94**, 1261-1281.
- 420 **Mani, M. S.** (2013). *Ecology and biogeography of high altitude insects*, Springer Science & Business Media.
- 421 **Marden, J. H.** (2003). The surface-skimming hypothesis for the evolution of insect flight. *Acta zoologica*  
422 *cracoviensia* **46**, 73-84.
- 423 **Orme, D., Freckleton, R., Thomas, G. and Petzoldt, T.** (2013). The caper package: comparative analysis of  
424 phylogenetics and evolution in R. *R package version* **5**, 1-36.
- 425 **Paradis, E., Claude, J. and Strimmer, K.** (2004). APE: analyses of phylogenetics and evolution in R  
426 language. *Bioinformatics* **20**, 289-290.
- 427 **Perrard, A., Baylac, M., Carpenter, J. M. and Villemant, C.** (2014). Evolution of wing shape in hornets:  
428 why is the wing venation efficient for species identification? *Journal of Evolutionary Biology* **27**, 2665-2675.
- 429 **Ragge, D. R.** (1955). The wing-venation of the order Phasmida. *Transactions of the Royal entomological*  
430 *Society of London* **106**, 375-392.
- 431 **Ritz, C., Baty, F., Streibig, J. C. and Gerhard, D.** (2015). Dose-Response Analysis Using R. *PLoS One* **10**.
- 432 **Roff, D. A.** (1994). The evolution of flightlessness: is history important? *Evolutionary Ecology* **8**, 639-657.
- 433 **Seow-Choen, F.** (2000). *An illustrated guide to the stick and leaf insects of Peninsular Malaysia and*  
434 *Singapore*, Natural History Publications (Borneo).
- 435 **Smart, J.** (1953). The wing-venation of the migratory locust (*Locusta migratoria* Linn.)(Insecta: Acridiidae).  
436 *Proceedings of the Zoological Society of London* **123**, 207-217.

- 437 **Sunada, S., Yasuda, T., Yasuda, K. and Kawachi, K.** (2002). Comparison of wing characteristics at an  
438 ultralow Reynolds number. *Journal of aircraft* **39**, 331-338.
- 439 **Thomas, A. L. and Taylor, G. K.** (2001). Animal flight dynamics I. Stability in gliding flight. *J Theor Biol*  
440 **212**, 399-424.
- 441 **Torres, G. E. and Mueller, T. J.** (2004). Low-aspect-ratio wing aerodynamics at low Reynolds number. *AIAA*  
442 *Journal* **42**, 865-873.
- 443 **Zeng, Y., Lam, K., Chen, Y., Gong, M., Xu, Z. and Dudley, R.** (2017). Biomechanics of aerial righting in  
444 wingless nymphal stick insects. *Interface Focus* **7**, 20160075.
- 445 **Zeng, Y., O'Malley, C., Singhal, S., Rahim, F., Park, S., Chen, X. and Dudley, R.** (2020). A tale of  
446 winglets: evolution of flight morphology in stick insects. *Frontiers in Ecology and Evolution* **8**, 121.
- 447

## Main Figures

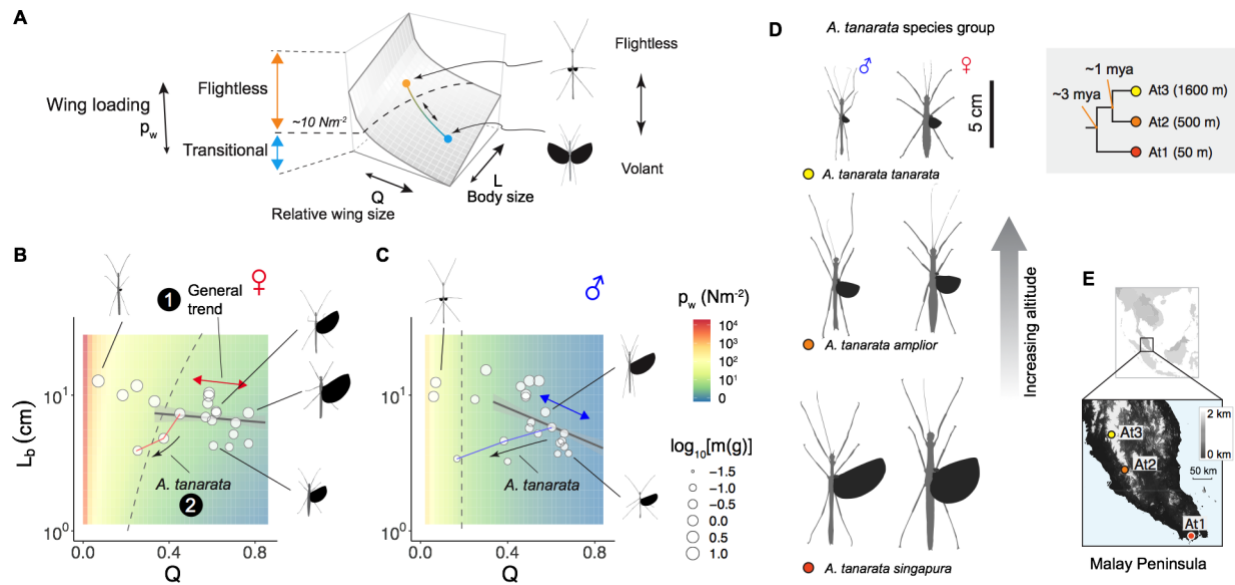

**Figure 1. General patterns of flight-related morphology in stick insects.**

(A) Evolution of flight morphology in stick insects can be represented by trajectories on a landscape of wing loading ( $p_w$ ) defined by relative wing size ( $Q$ ) and body size ( $L$ ) (see Zeng et al., 2020). Stick insects exhibit a continuous transition from flight-capable to flightless morphology over  $p_w < \sim 10 \text{ Nm}^{-2}$

(B) Male and (C) female stick insects sampled here and plotted on sex-specific  $p_w$  landscapes, with dashed contour lines showing critical  $p_w \sim 10 \text{ Nm}^{-2}$ , with dot size representing whole-insect mass. Solid trend lines represent the general pattern – an inverse correlation between  $L$  and  $Q$  in flight evolution (based on  $\sim 270$  morphologies for each sex; see Zeng et al., 2020). As an outlier, the *Asceles tanarata* species group (annotated with arrows) exhibited intraspecific reductions in both  $L$  and  $Q$  with increasing altitude.

(D) Dorsally projected profiles of the three subspecies of the *A. tanarata* species group, showing reductions in body and wing size at greater altitude. At right are the phylogenetic relationships among three subspecies, with nodes annotated with divergence time (see Zeng et al., 2020).

(E) An altitudinal map of the Malay Peninsula, annotated with locations where three subspecies were collected: At1, Singapore; At2, Cameron Highland; At3, Genting Highland.

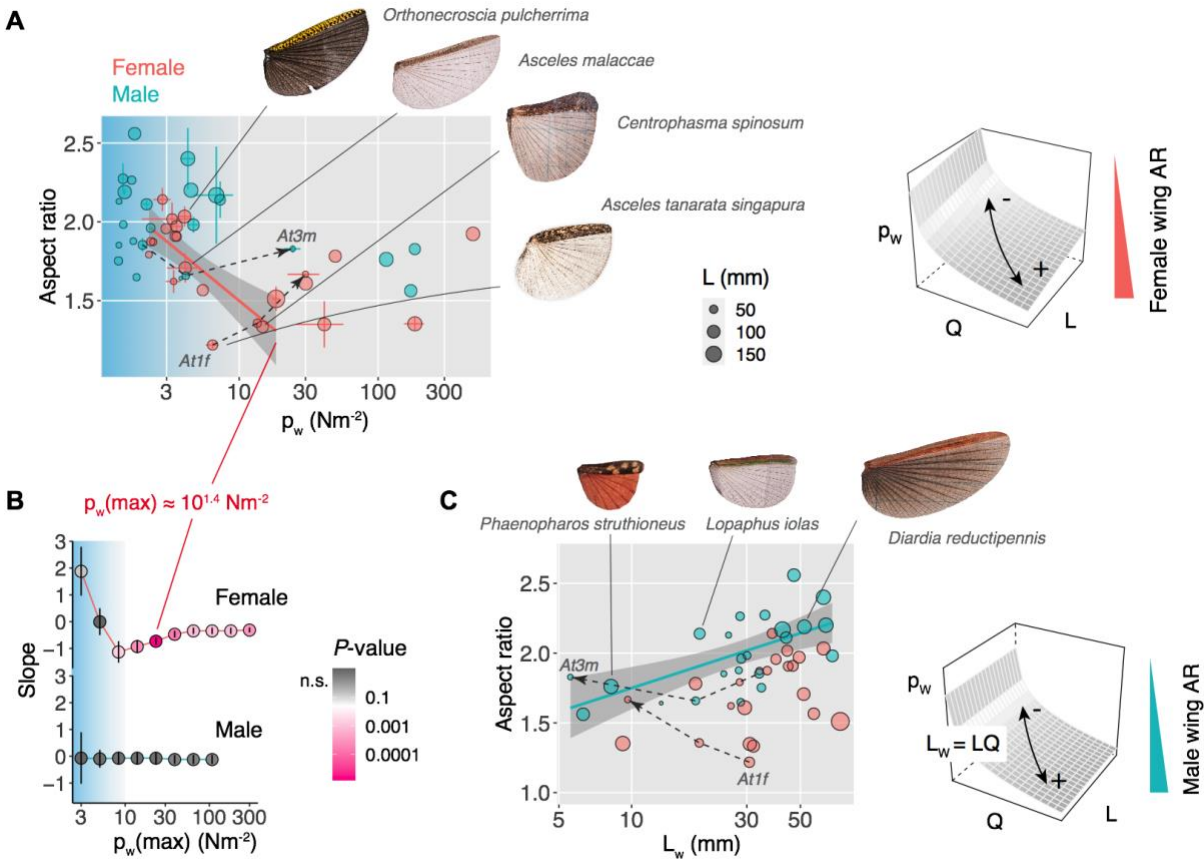

**Figure 2. Sex-specific evolution of stick insect wing shape.**

(A) Wing aspect ratio (AR) versus wing loading ( $p_w$ ) ( $N = 25$  for both female and male taxa). Colors represent sexes; dot sizes represent body length. Note a clear reduction of AR in wings of females over  $p_w > 4 \text{ Nm}^{-2}$ , while wings of male insects show no such reduction. Such trend is further elucidated with a sensitivity analysis in (B), where generalized linear regression models were performed with different upper limit of wing loading,  $p_w(\text{max})$ . The variation of slope coefficient was plotted against  $p_w$ , with error bars representing standard error, and color representing  $P$ -value. For females, the lowest slope coefficient corresponds with  $p_w(\text{max}) = 10^{0.92} \text{ Nm}^{-2}$ , while the lowest  $P$ -value corresponds with  $p_w(\text{max}) = 10^{1.4} \text{ Nm}^{-2}$ , as shown by the trend line in (A). For males, the correlation between AR and  $p_w$  was non-significant and insensitive to the choice of  $p_w(\text{max})$ .

(C) The variation of AR with absolute wing length ( $L_w = LQ$ ), whereby the wings of males exhibited a significant positive correlation ( $P < 0.01$ ) with increasing  $L_w$ . Annotated at the right are schematics summarizing sex-specific variation in wing shape: the AR in females varies with  $p_w$ , while the AR in males correlates with  $L_w$ , thus varying with body size  $L$  despite the  $p_w$  landscape being invariant of body size (see Zeng et al., 2020). In (A) and (C), arrows with dashed lines represent variation within *A. tanarata* species group along increasing altitude. See **SI Data S2** for phylogenetically justified correlations.

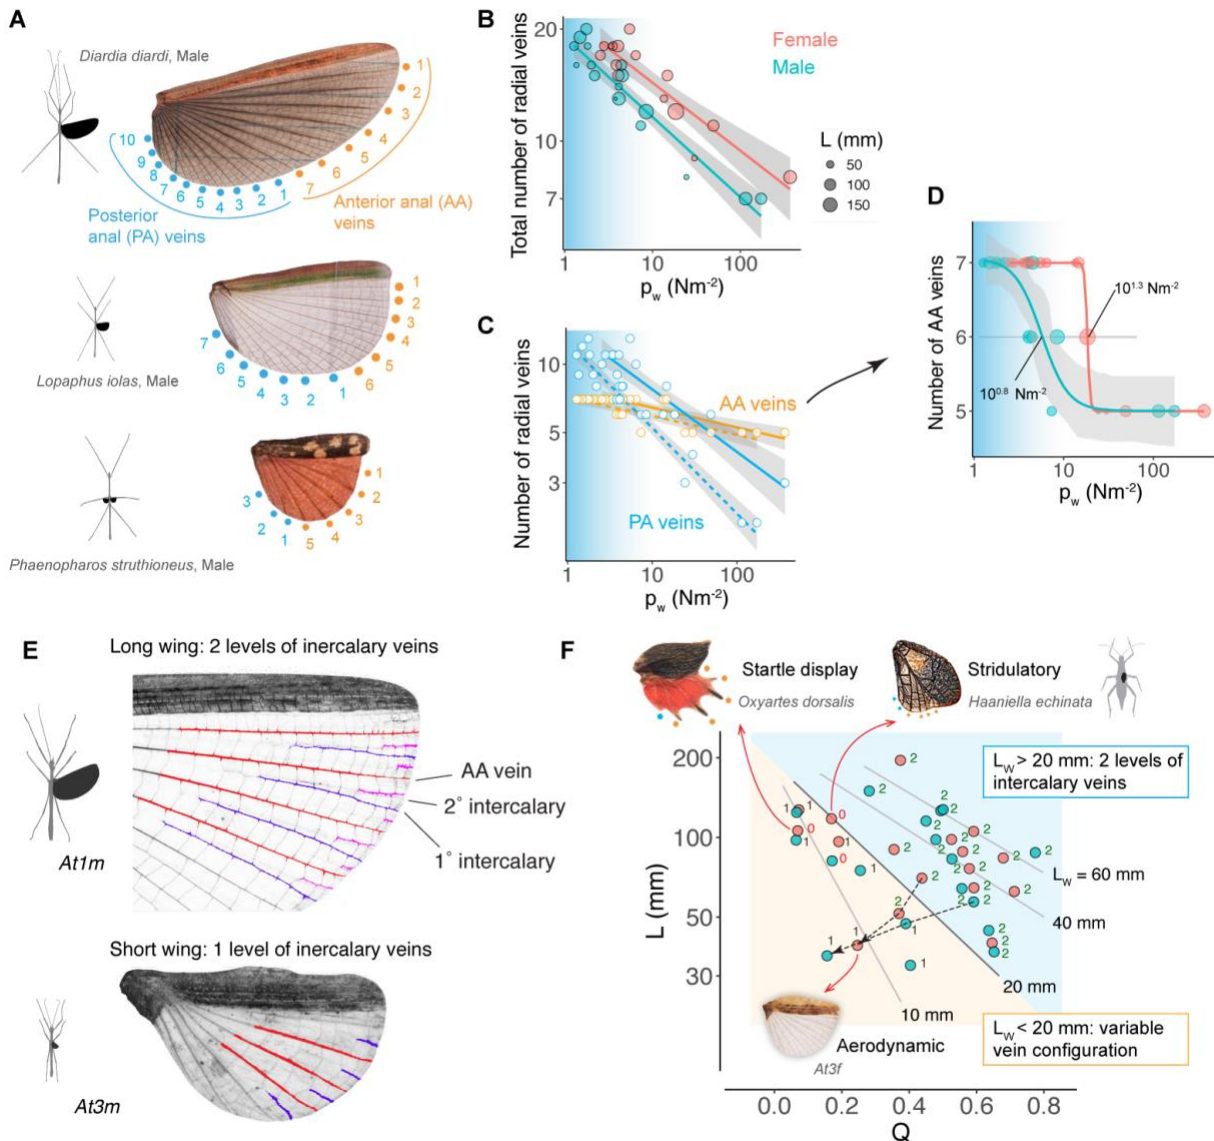

**Figure 3. Evolution of stick insect wing venation.**

(A) Exemplar wings showing reduction of primary radial veins – anterior anal (AA) and posterior anal (PA) veins. The number of AA veins is conserved, while the number of PA veins varies with relative wing size and wing loading. (B) The total number of radial veins ( $N_V$ ) reduces with increasing wing loading  $p_w$  ( $N = 34$  female taxa;  $N = 36$  male taxa). (C) Considering two vein groups individually, the number of PA veins varied between 2 – 14 (blue) and is linearly correlated with  $p_w$ , while the number of AA veins ( $N_{AA}$ ) is more conserved, varying between 5 – 7 (orange). Trend lines are based on linear regression models.

(D) The transition of  $N_{AA}$  from 7 to 5 with increasing  $p_w$ , as fitted with sigmoid functions (SI Data S1). The model-predicted critical  $p_w$  at  $N_{AA} = 6$  is  $10^{0.75} \text{ Nm}^{-2}$  and  $10^{1.3}$  for males and females, respectively.

(E) As gap size between adjacent radial veins increases toward the wing margin, intercalary veins are developed. Long wings possess two levels of intercalary veins, while short wings possess only one, as demonstrated here using At1m and At3m. (F) Across all sample taxa, the loss of the 2° intercalary vein corresponds with absolute wing length  $L_w < \sim 20$  mm. Plot shows the levels of intercalary veins as numbers with respect to  $L$  and  $Q$ , where isolines represent  $L_w$ . Relatively more variable venation with derived functions was found in the regime of  $L_w < 20$  mm. Two wings with non-aerodynamic functions and no intercalary veins are annotated on the top, contrasting another wing (from At3f) with 1° intercalary veins and potential aerodynamic utility. Values correspond to taxa-specific means; in (B), (D) and (F), dashed lines with arrows show variation in the *A. tanarata* group.



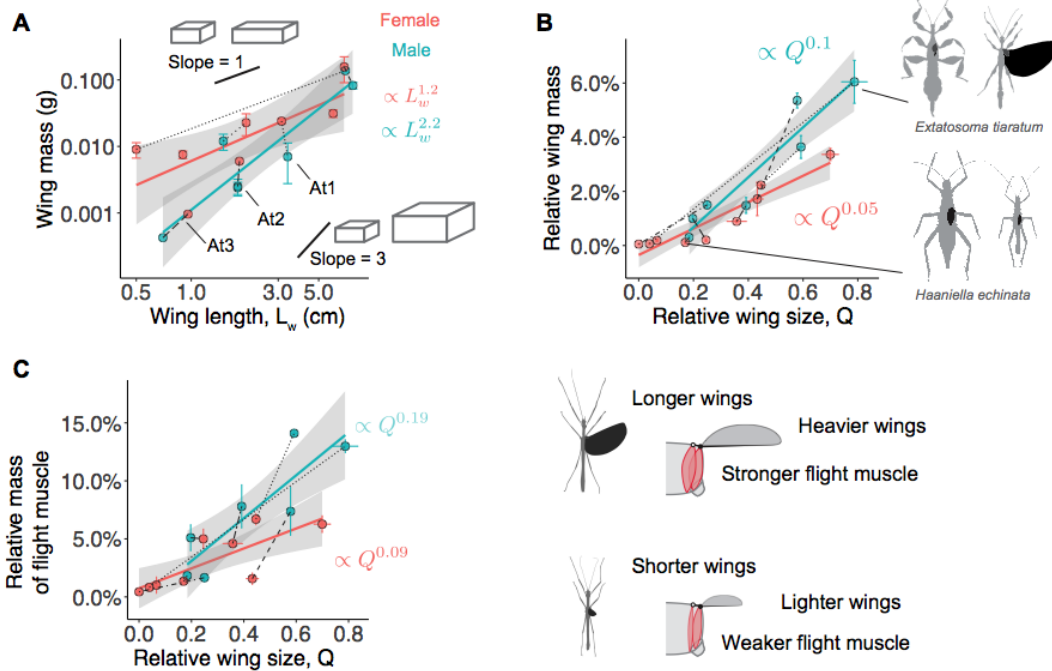

**Figure 4. Scaling of wing mass and flight muscle mass.**

(A) Sex-specific scaling of wing mass with respect to absolute wing length ( $L_w$ ) ( $N = 9$  female taxa;  $N = 7$  male taxa). Point shape and trend lines represent different sexes; colors represent different species. Females possess heavier wings than males with the same wing size. The power-law exponents (1.2 – 2.2) are intermediate to two models: (i) exponent = 3, if dimensions of wings increase isometrically in all three dimensions; (ii) exponent = 1, if wing thickness were conserved and mass is proportional to wing length.

(B) The power-law scaling of relative wing mass (i.e., with respect to whole-insect mass) with respect to relative wing size  $Q$ , showing that females possess relatively lighter wings than males.

(C) The power-law scaling of flight muscle mass with respect to relative wing size  $Q$ , showing that males have greater volume of flight muscle than females. Values represent taxa-specific means  $\pm$  S.D. Trend lines are based on linear regression models; males and females of the same species are connected by dashed or dotted lines.

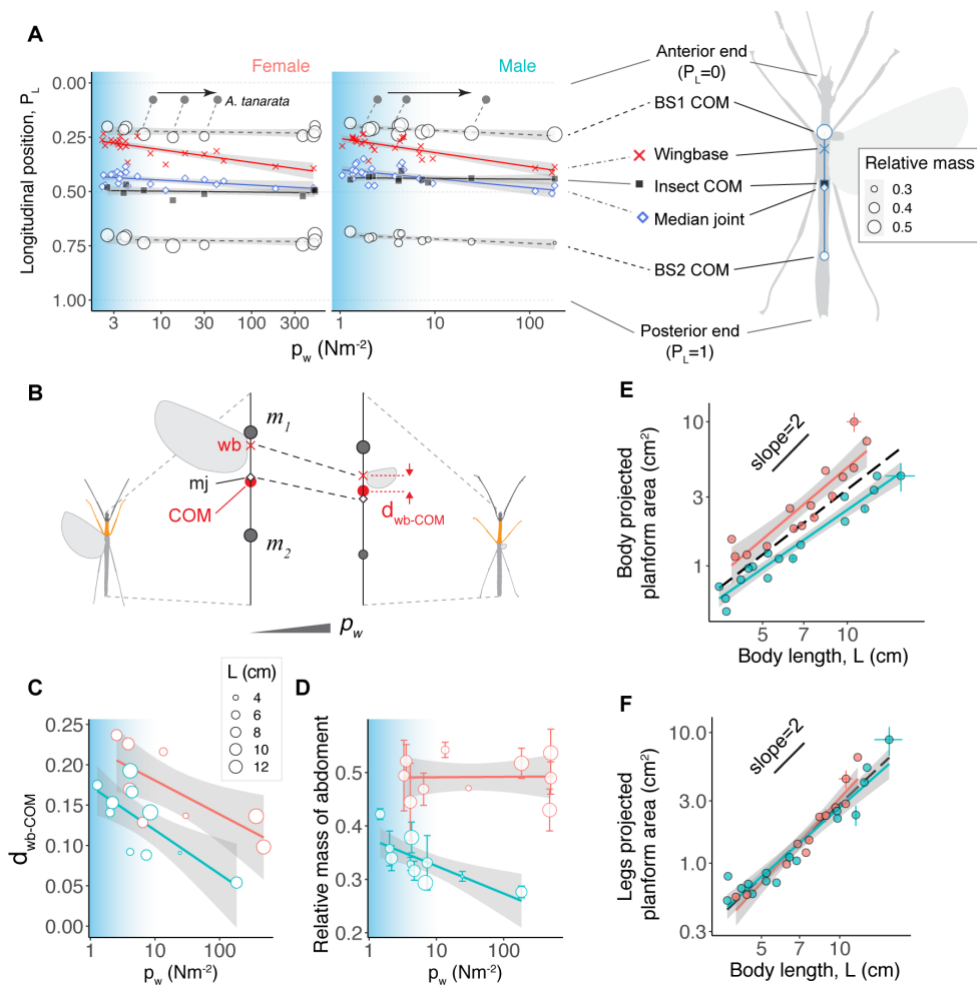

**Figure 5. Variations of body and leg morphology.**

(A) Normalized longitudinal positions of flight-related morphological landmarks plotted against wing loading ( $p_w$ ) (see legend to the right). The positions of the wingbase (red) and median joint (blue) shift posteriorly with increasing  $p_w$ , while the position of whole-insect COM is relatively unchanged. The size of open dots represents relative mass ( $N = 10$  for both male and female taxa); trend lines are based on linear regression models ( $N = 23$  female taxa;  $N = 26$  male taxa). Black arrows represent the *A. tanarata* species group along increasing altitude. (B) Schematic demonstration of shifts in wingbase (wb) and median joint (mj) with respect to wing reduction, which is coupled with elongation of the mesothoracic segment (orange), as demonstrated with two exemplar profiles.

(C) The distance between wingbase and whole-insect COM ( $d_{wb-COM}$ ) decreases with increasing  $p_w$  in both sexes. (D) The relative mass of abdomen decreases with increasing  $p_w$  in males, but not in females.

(E) Projected planform area of body sections scales with body size with a sex-averaged power-law exponent  $1.54 \pm 0.15$  (mean  $\pm$  S.E.) ( $N = 18$  female taxa;  $N = 20$  male taxa). An exponent  $< 2$  suggests disproportionate increase in slenderness as stick insects become longer. The greater slope intercept in females corresponds to wider body segments. (F) Projected planform area of all legs exhibits a near-isometry with body length, with a sex-averaged power-law exponent of  $1.74 \pm 0.13$  (mean  $\pm$  S.E.). See **SI Table S1** and **Data S1** for details.

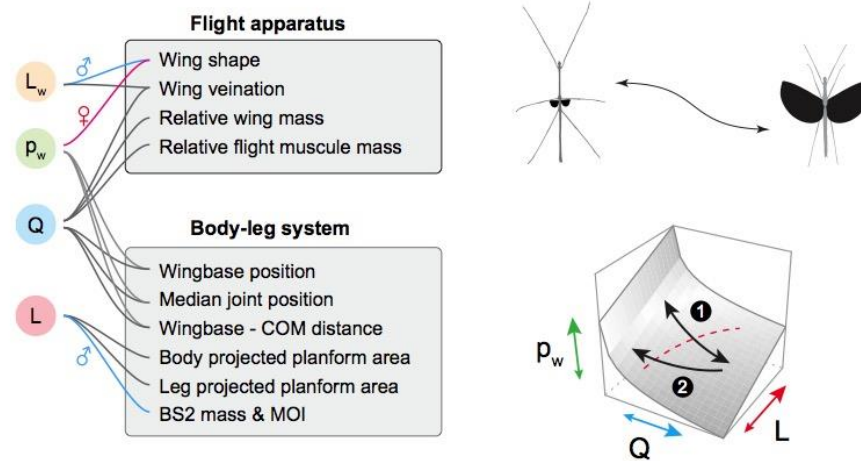

**Figure 6. Summary of the evolution of flight-related morphology in stick insects.**

**(Left)** Summary of correlations between morphological and flight-relevant parameters for four principal variables (wing loading,  $p_w$ ; relative wing size,  $Q$ ; body size,  $L$ ; absolute wing size  $L_w$ ). Colored lines represent sex-specific correlations. See **SI Table S1** for more details.

**(Right)** Two types of evolutionary trajectories on the  $p_w$  landscape in phasmids: (1) the general inverse correlation between  $L$  and  $Q$ , and (2) coupled reductions in  $L$  and  $Q$  exhibited by the *A. tanarata* species group (see **SI Section A** for more details). Gain and loss of flight (most generally represented by  $p_w$ ) mainly follow the direction of wing size evolution ( $Q$ ), but are influenced by body size evolution and other sex-specific traits within a variety of ecological contexts.

**A**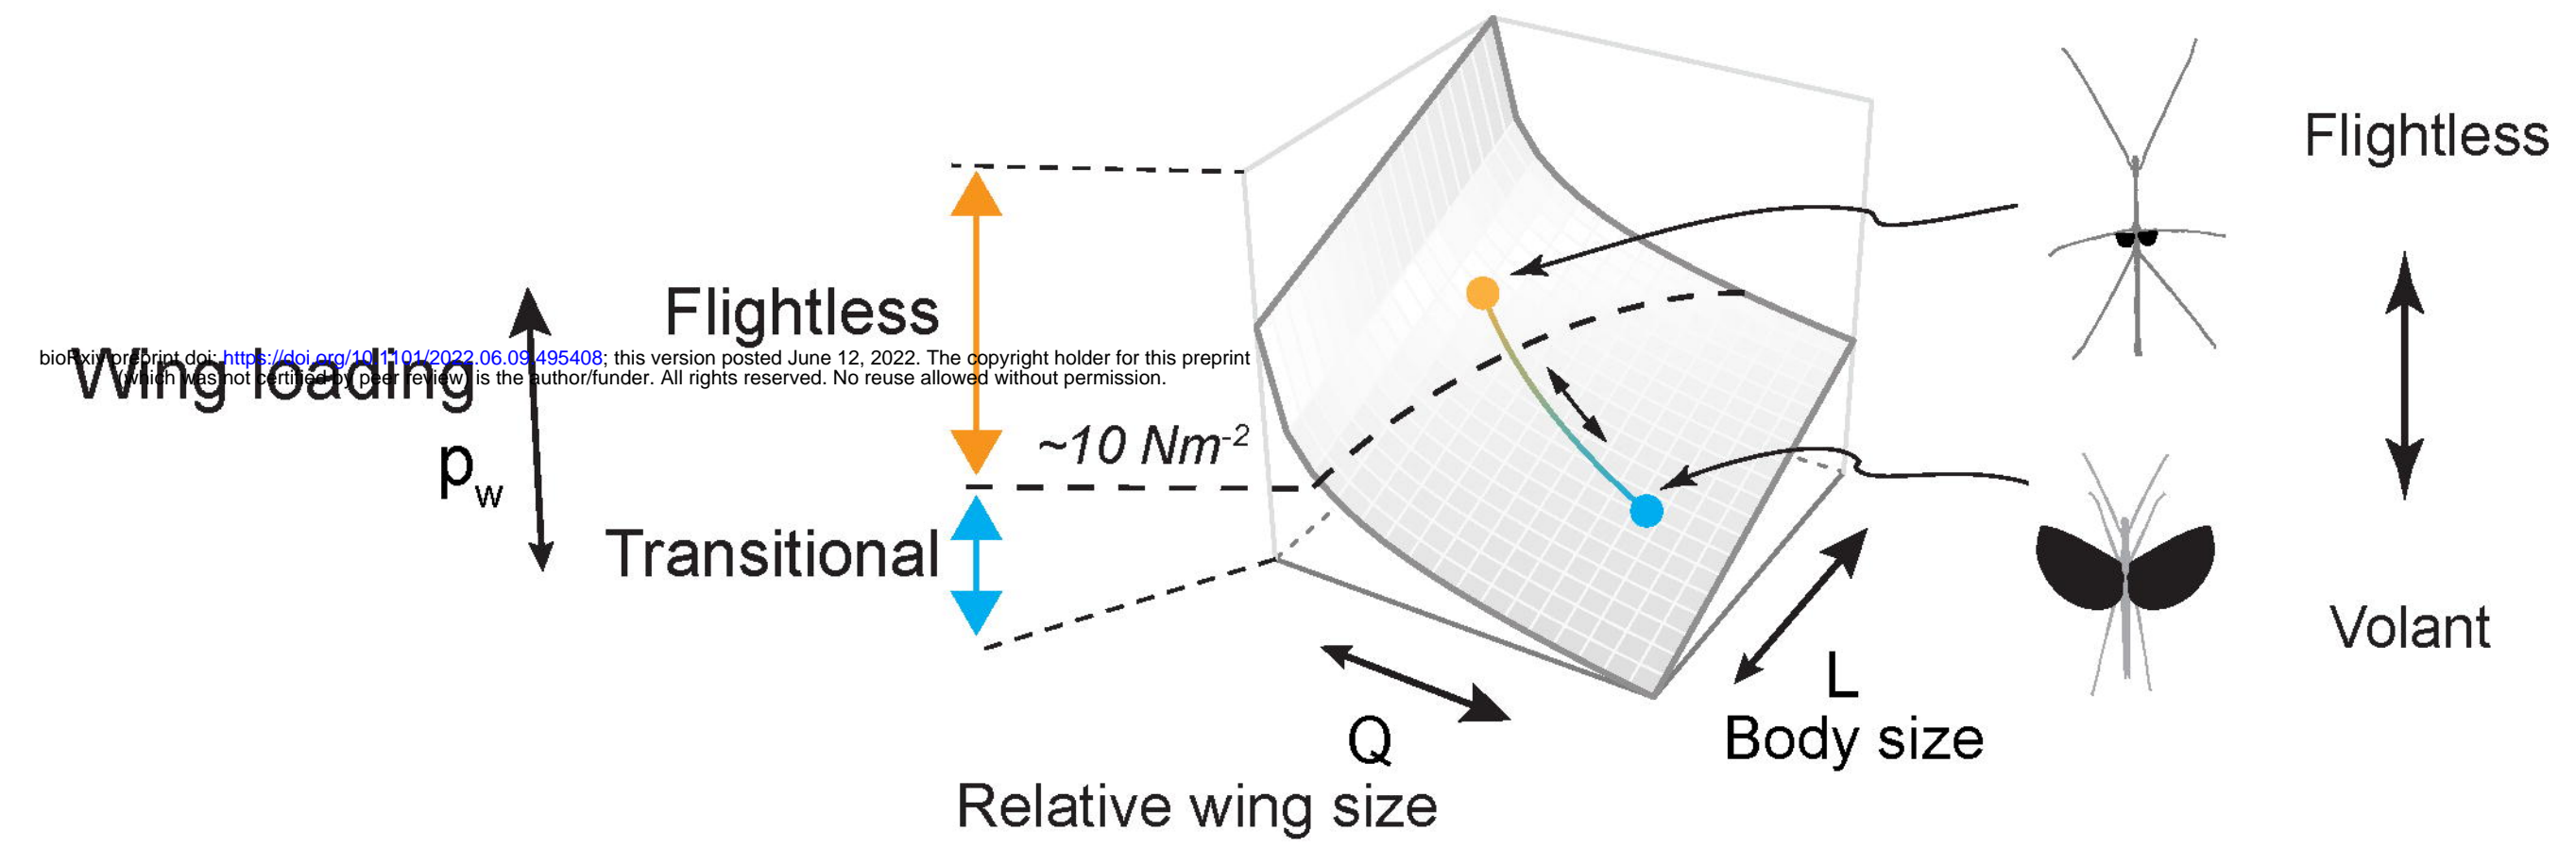**B**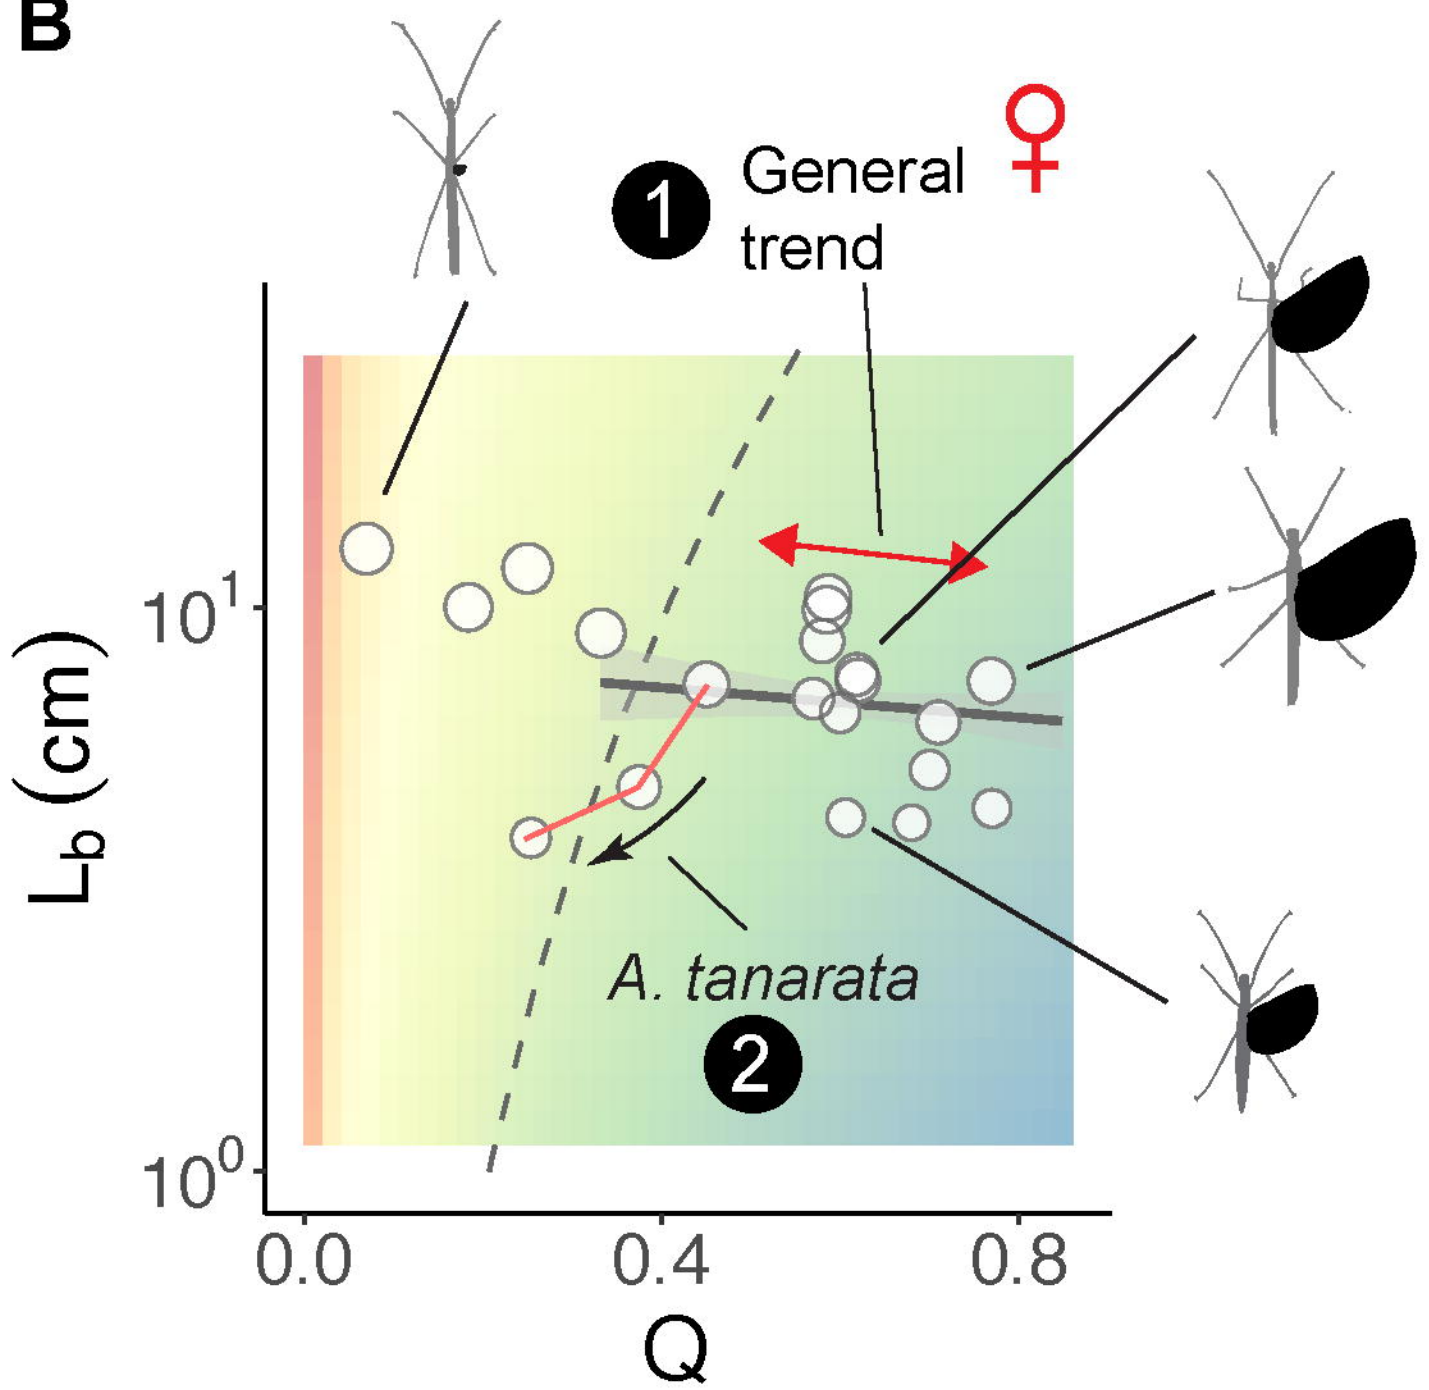**C**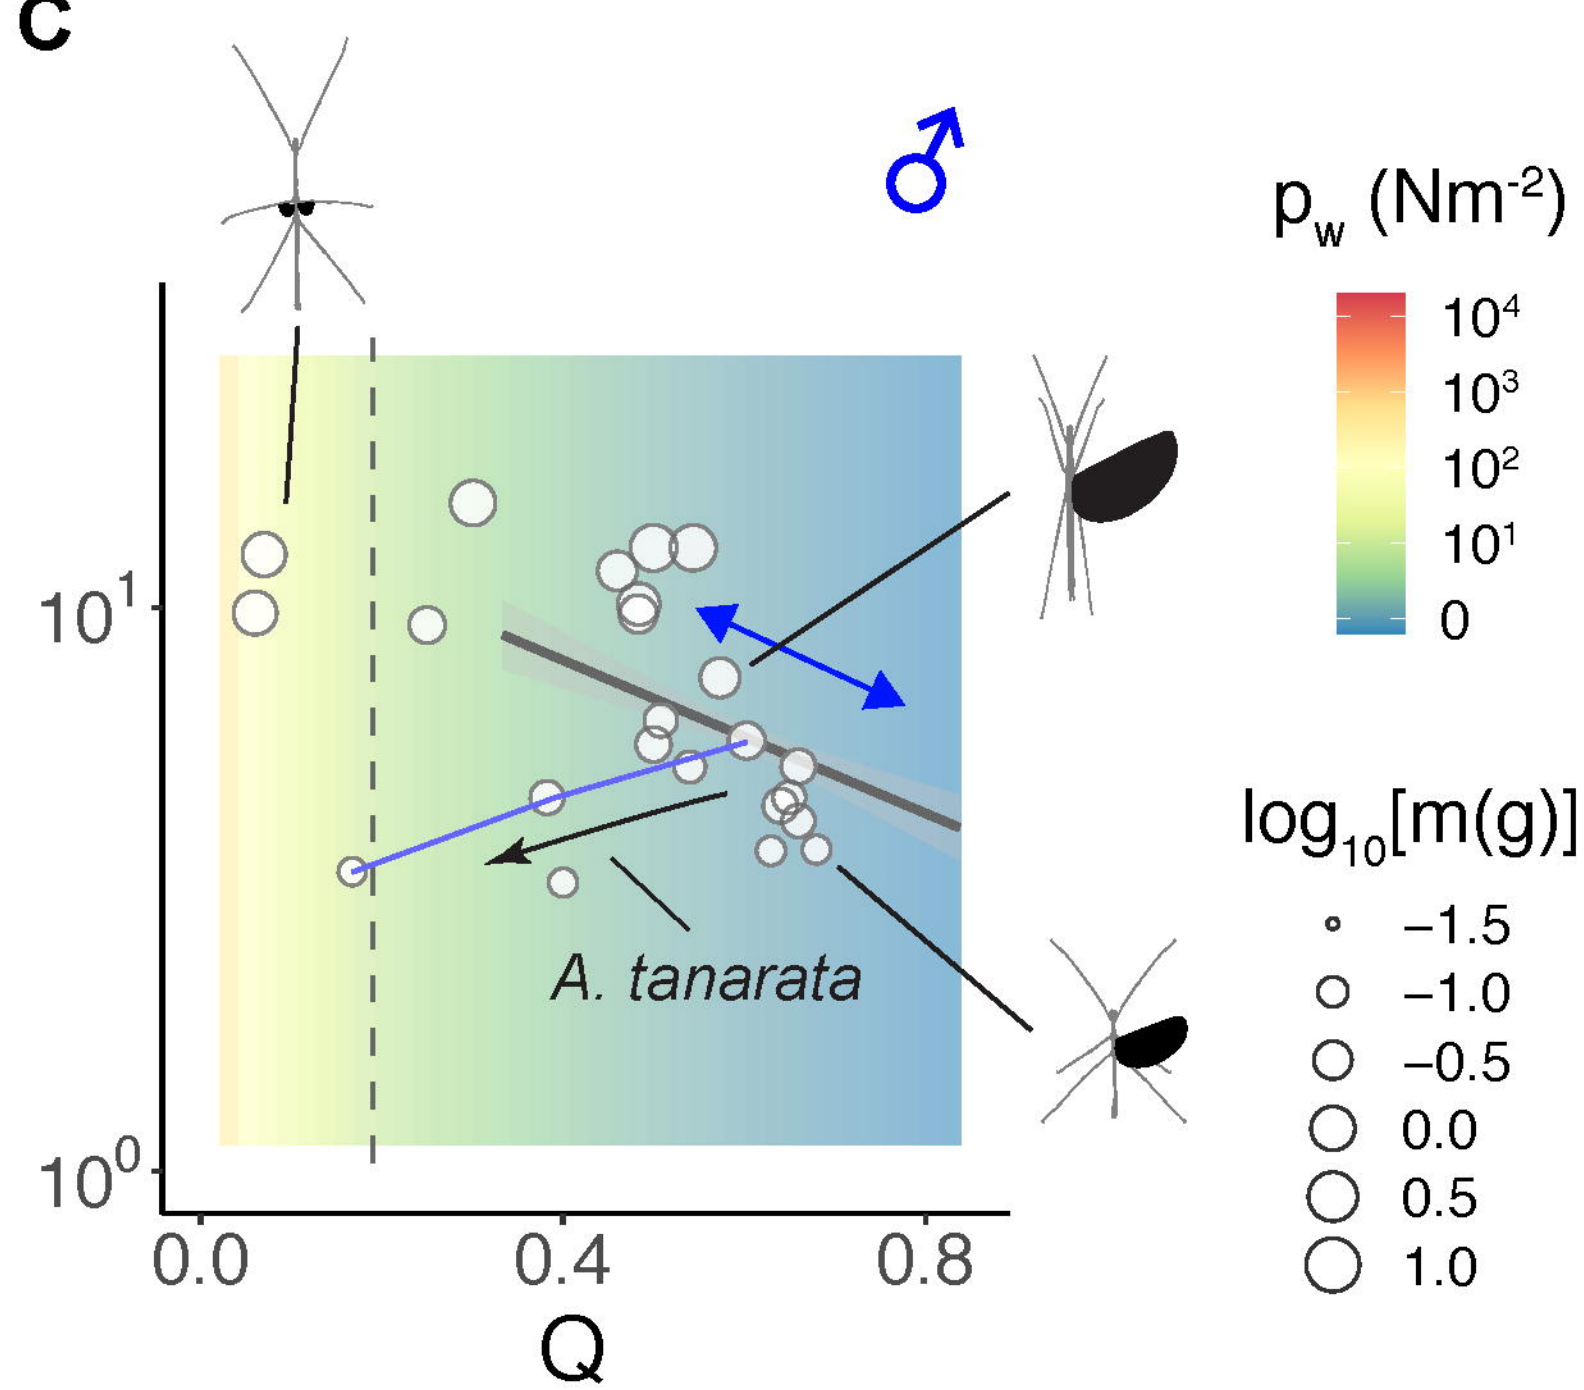**D**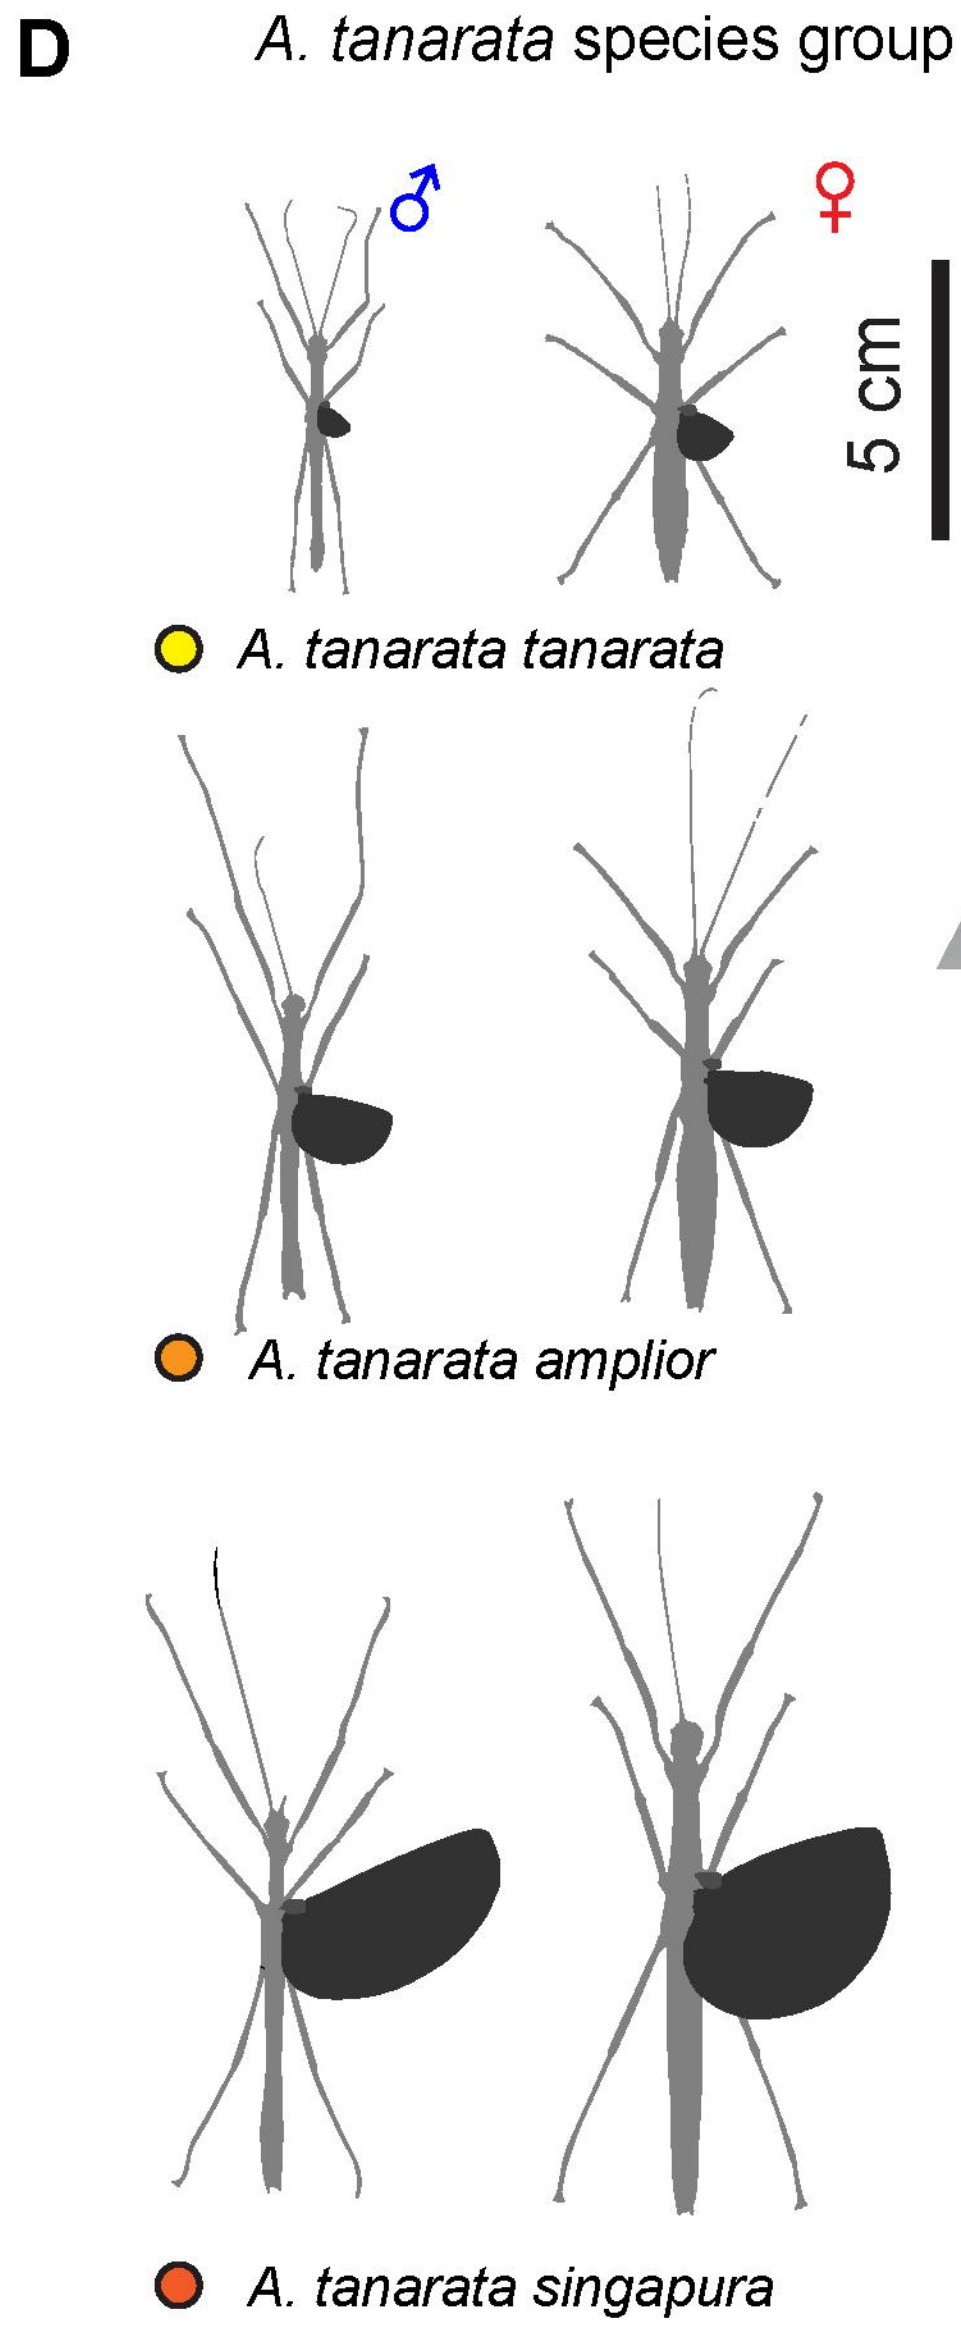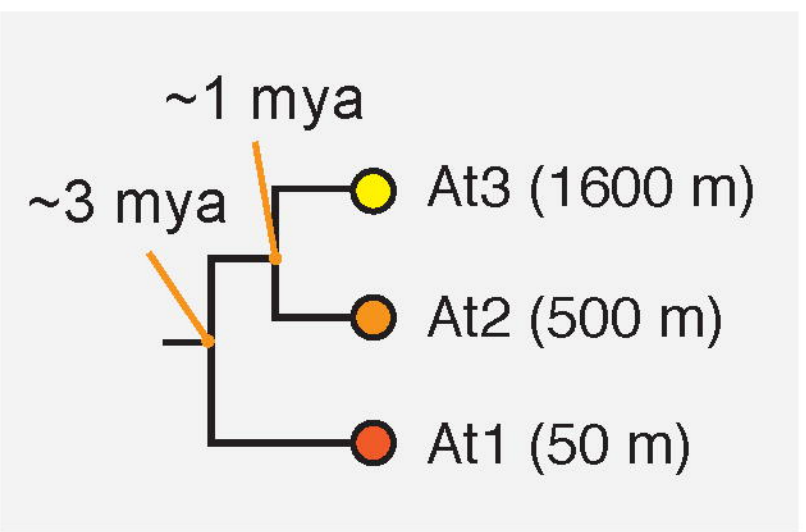**E**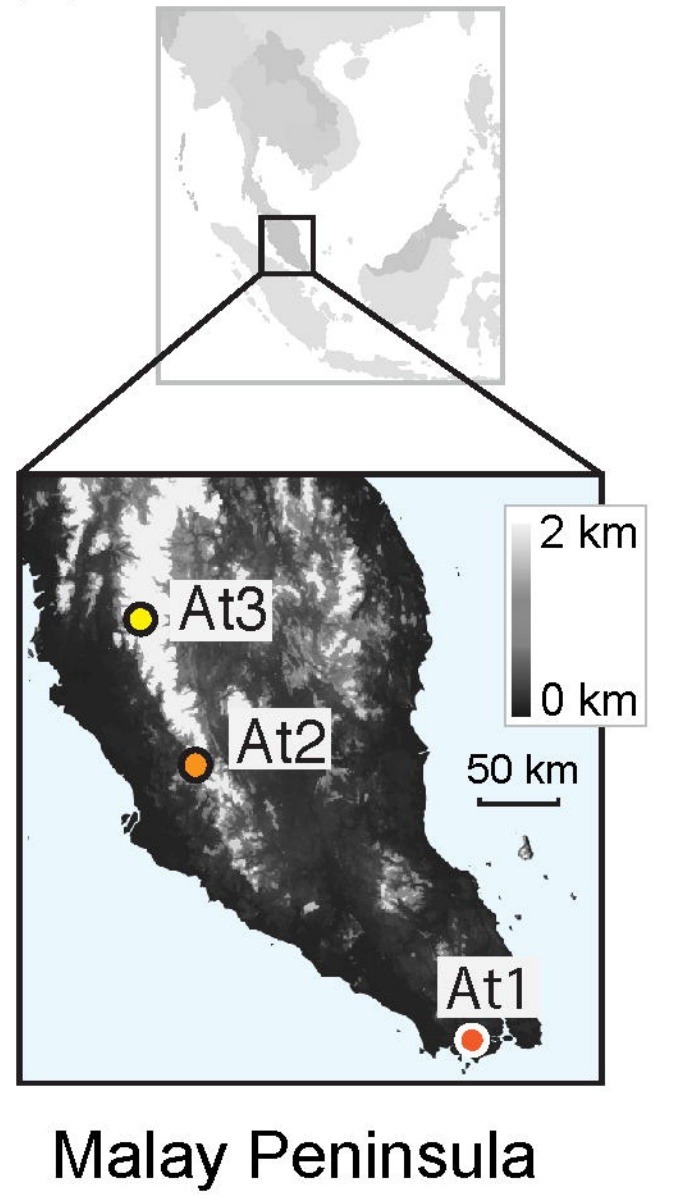

**A**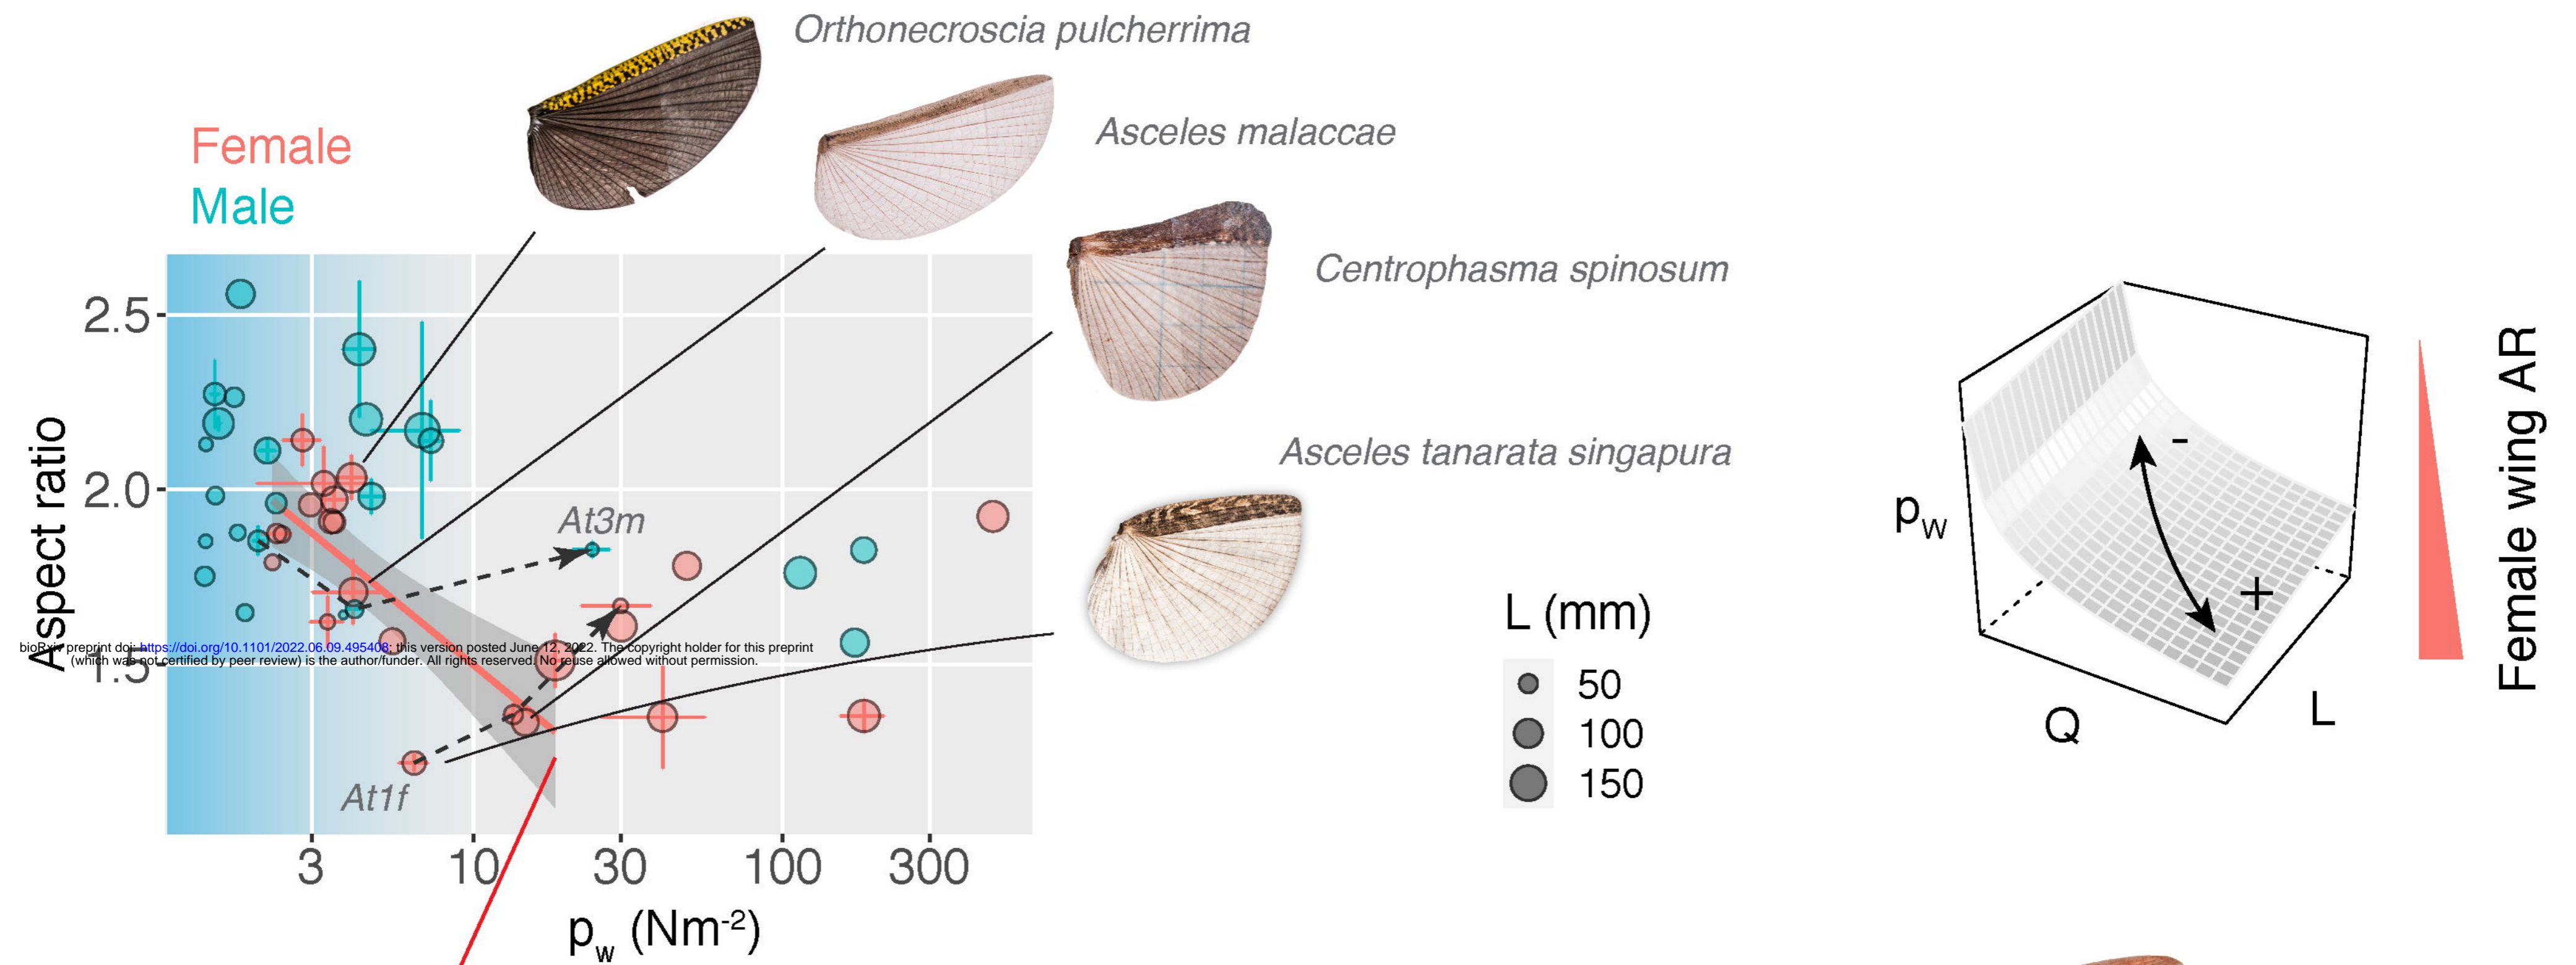**B**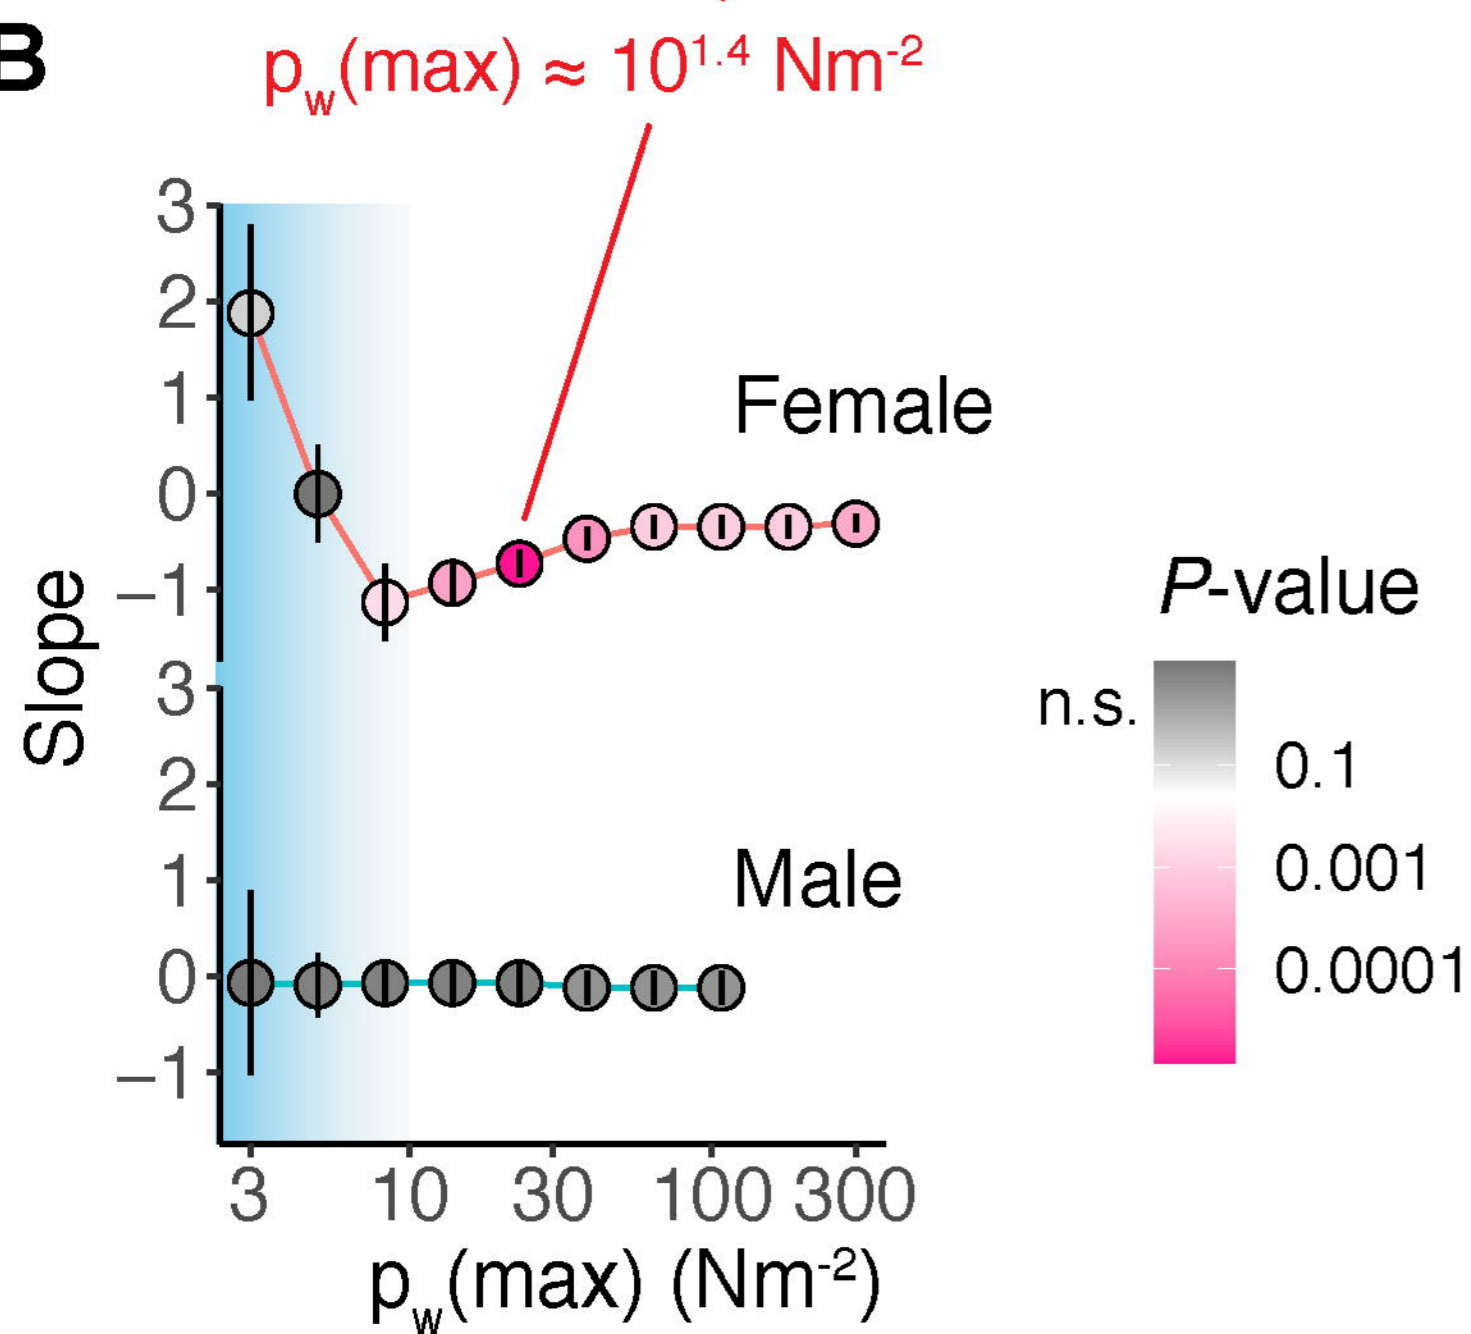**C**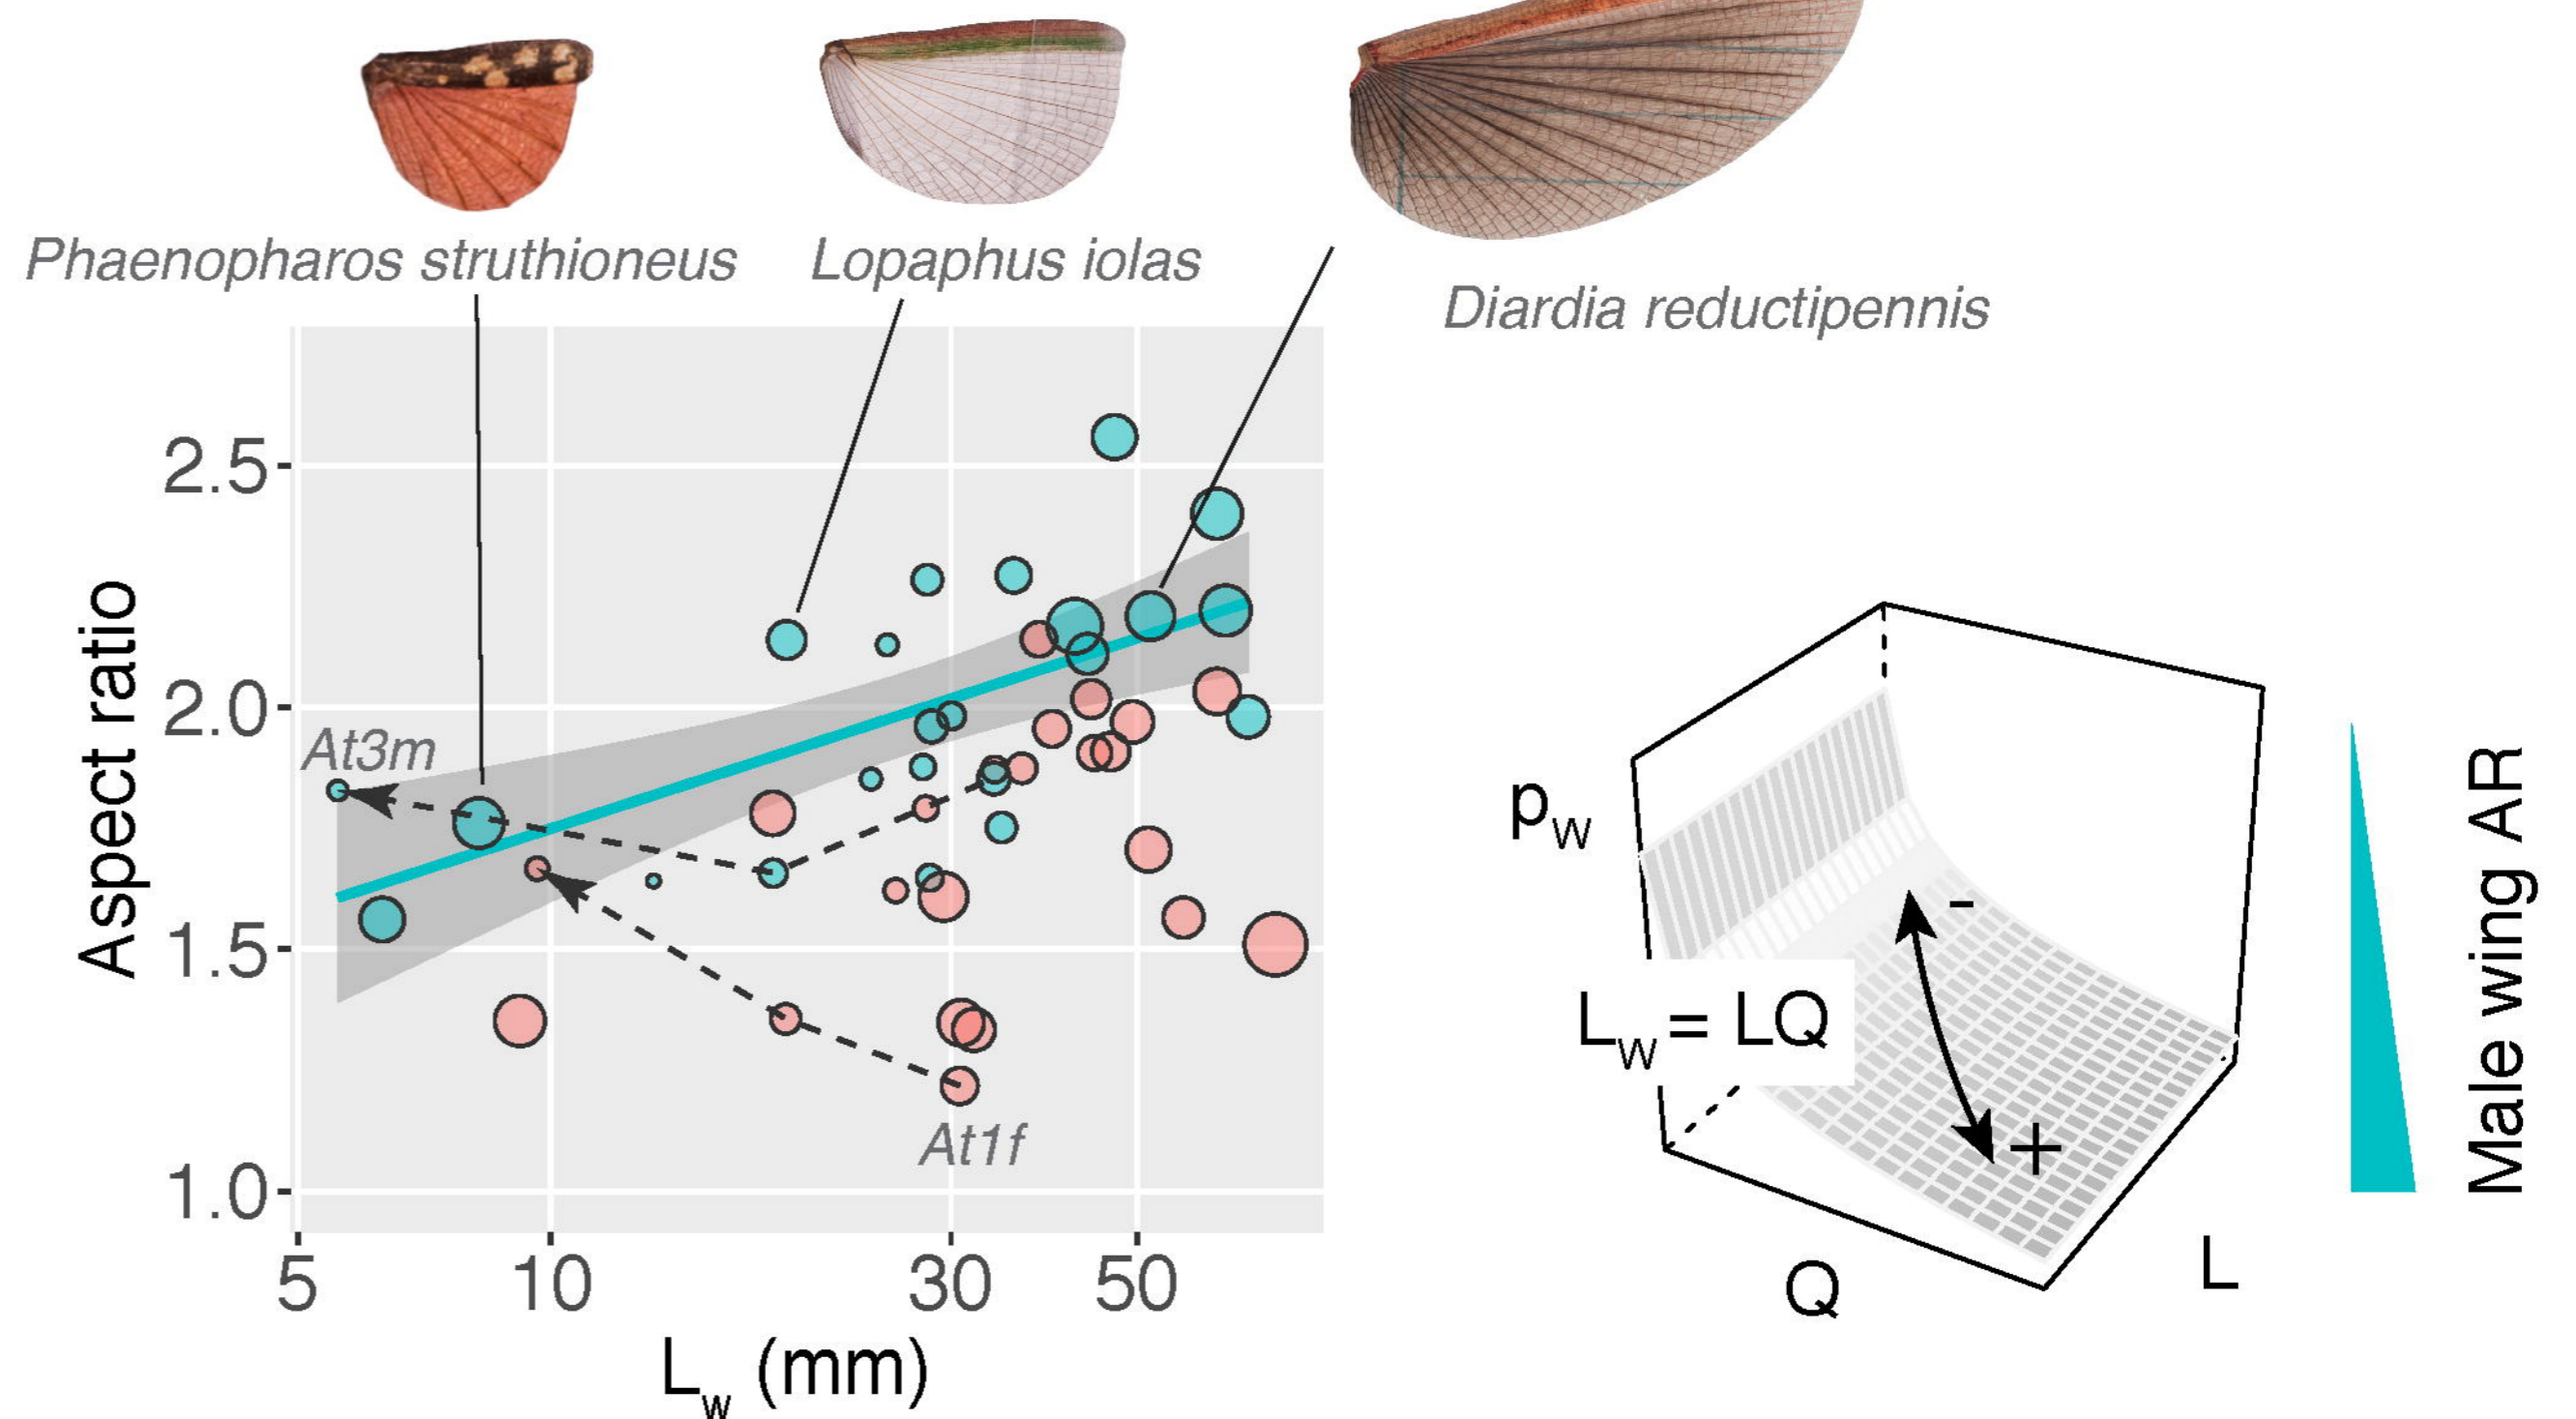

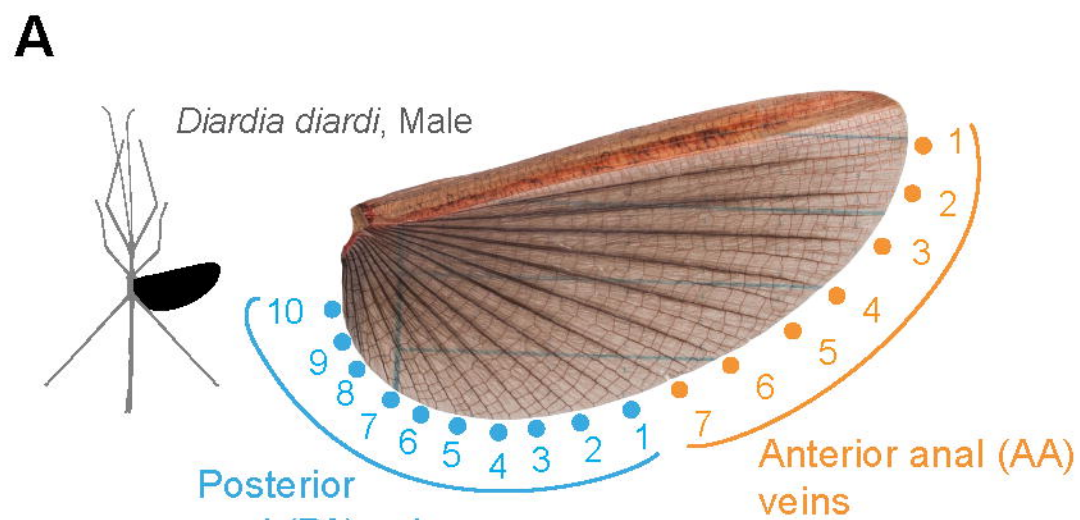

bioRxiv preprint doi: <https://doi.org/10.1101/2022.06.09.495408>; this version posted June 12, 2022. The copyright holder for this preprint (which was not certified by peer review) is the author/funder. All rights reserved. No reuse allowed without permission.

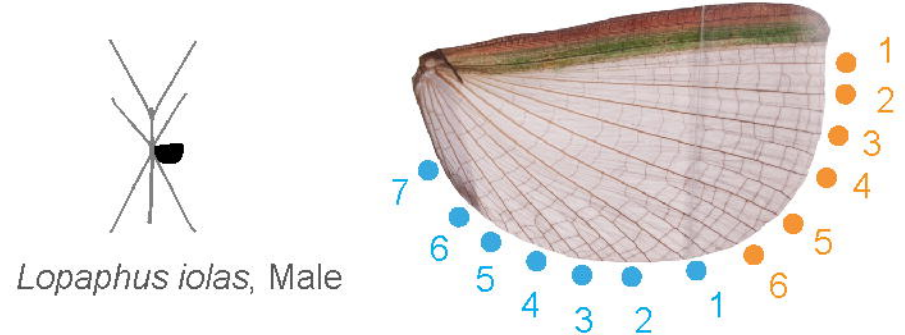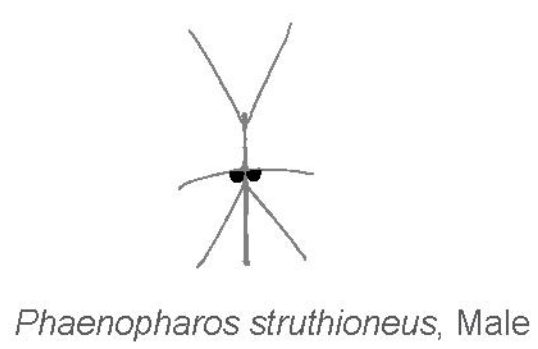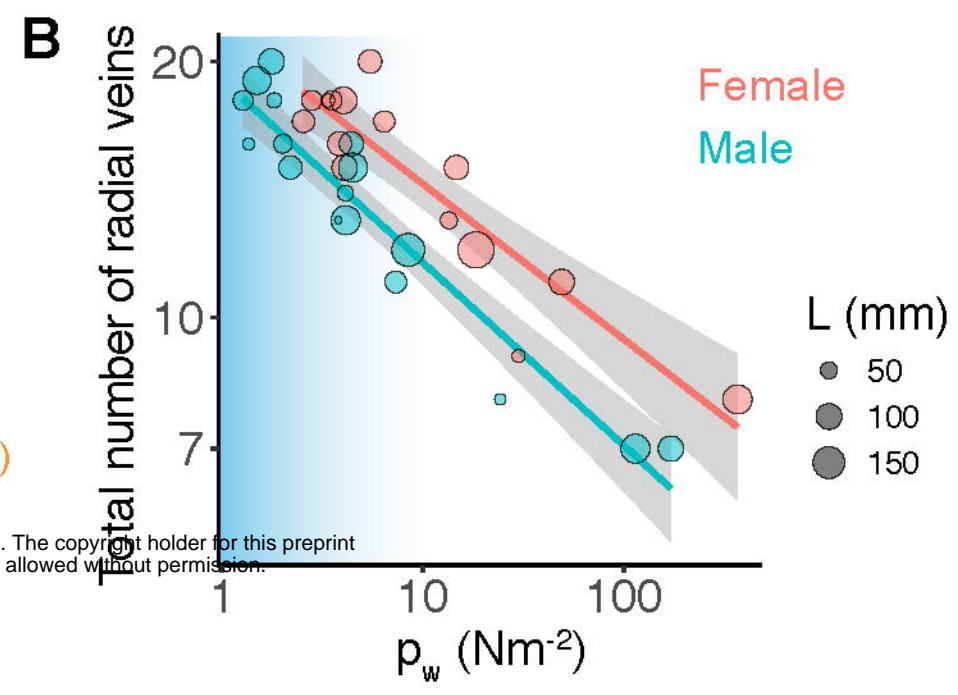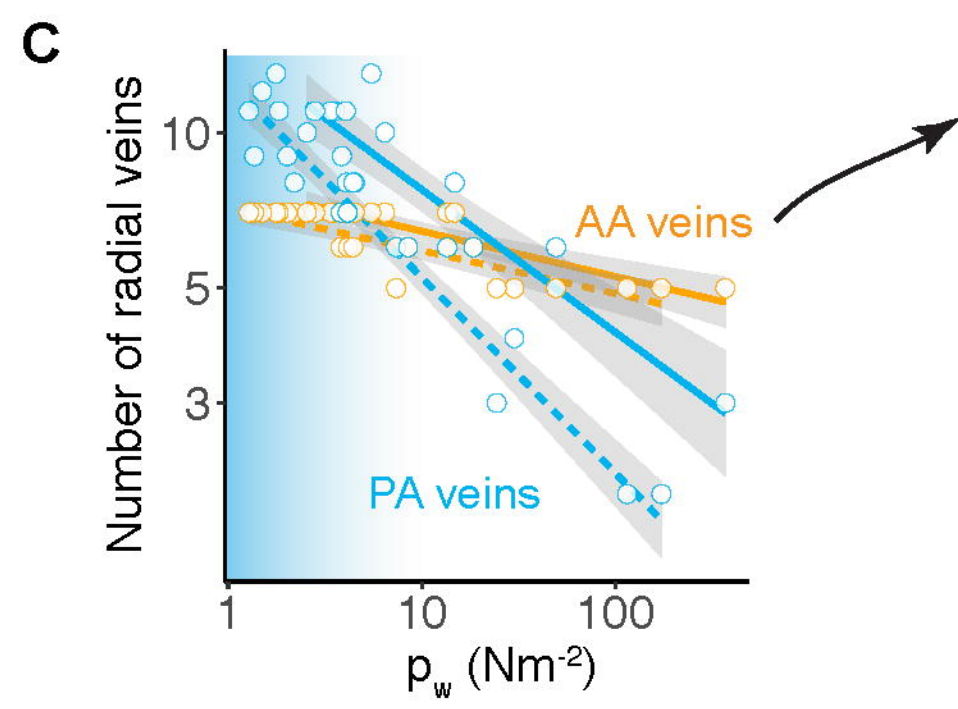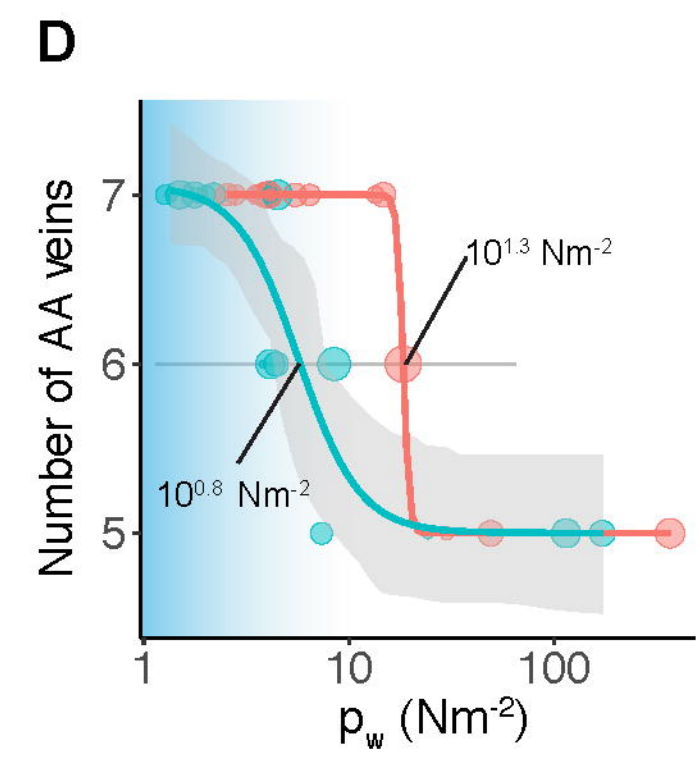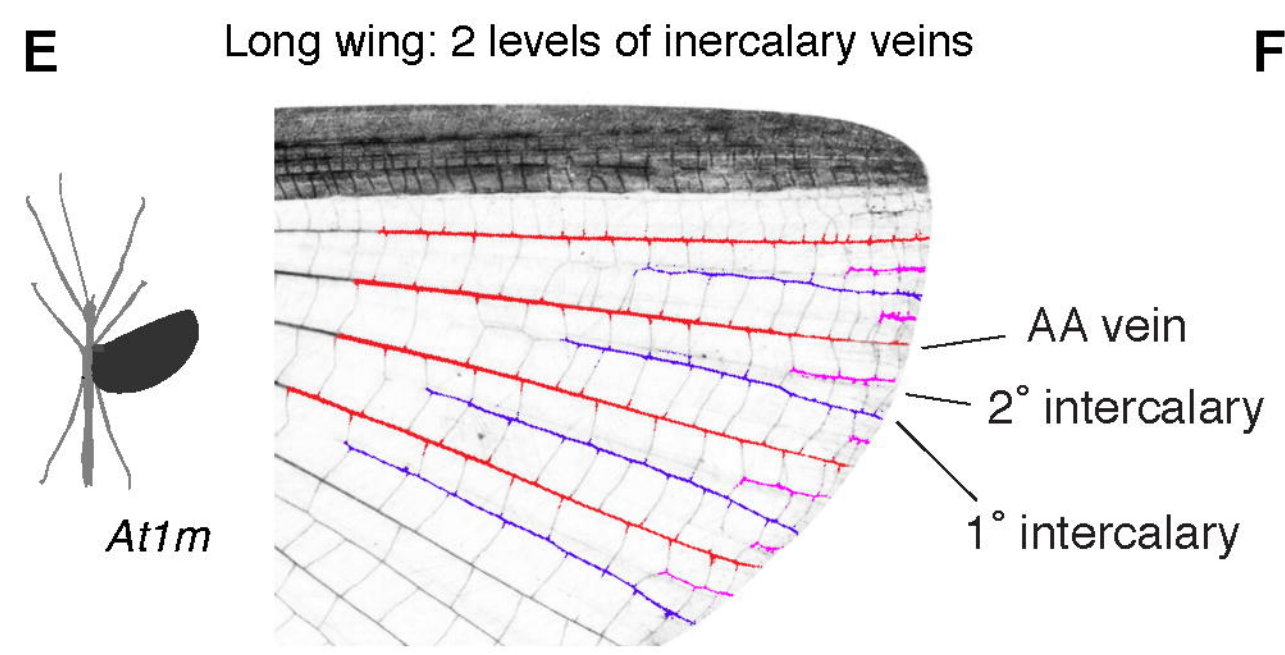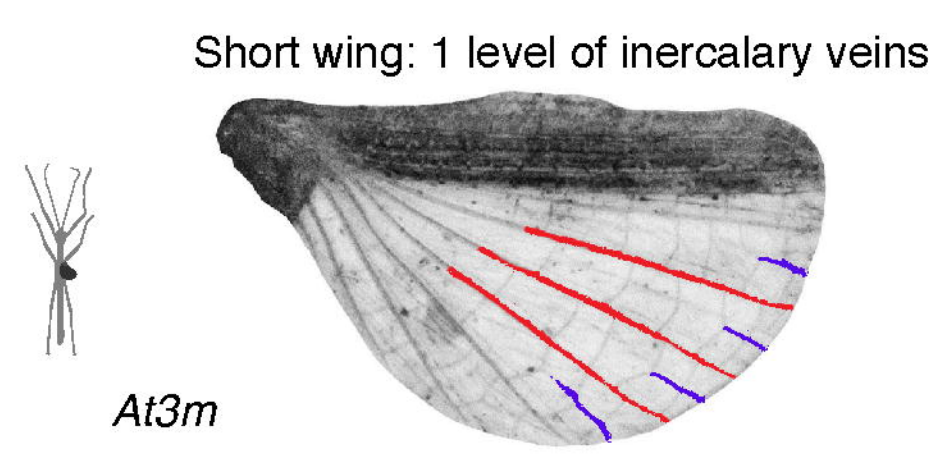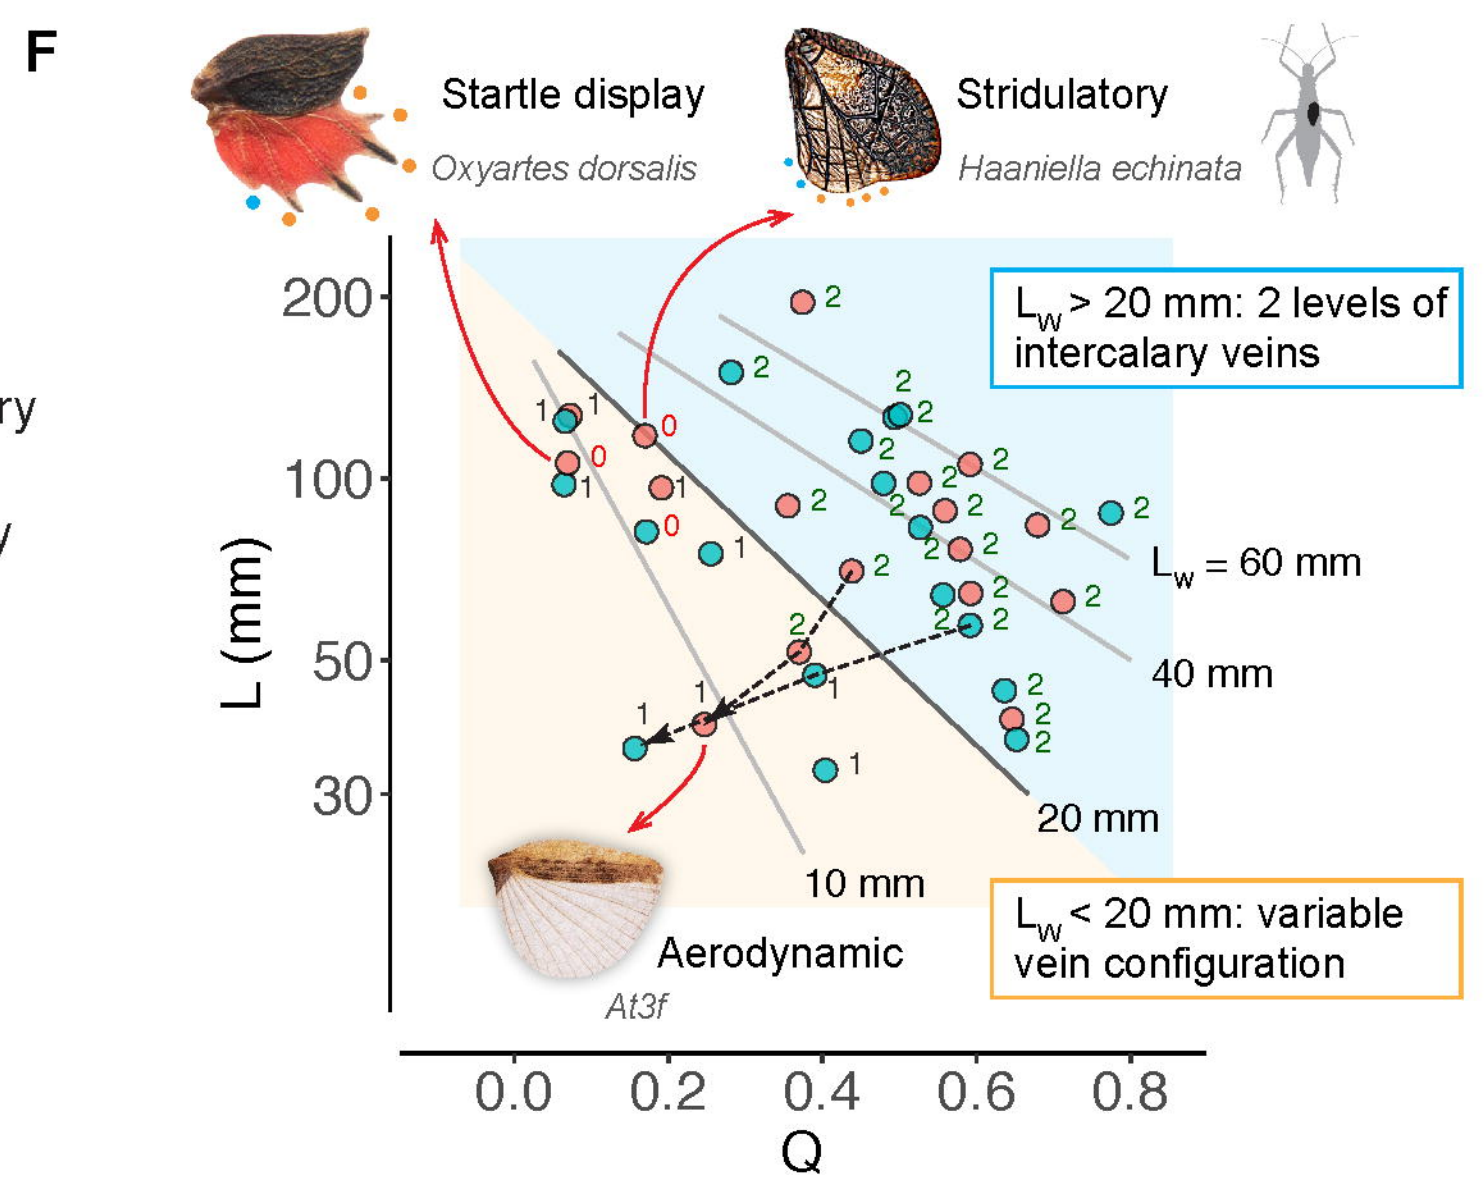

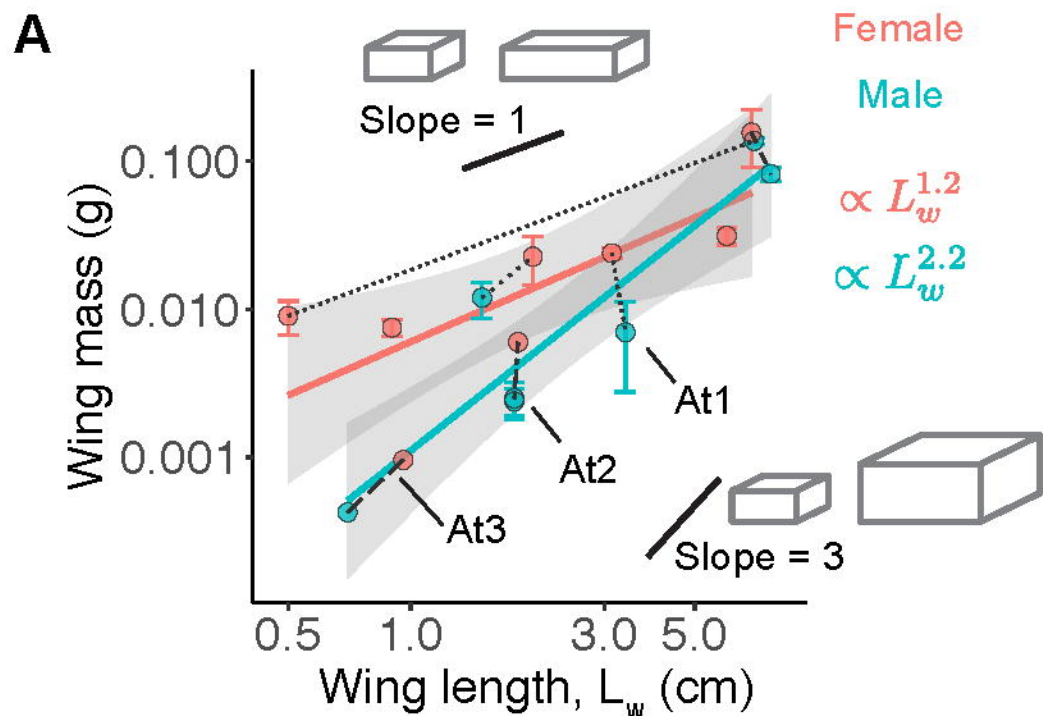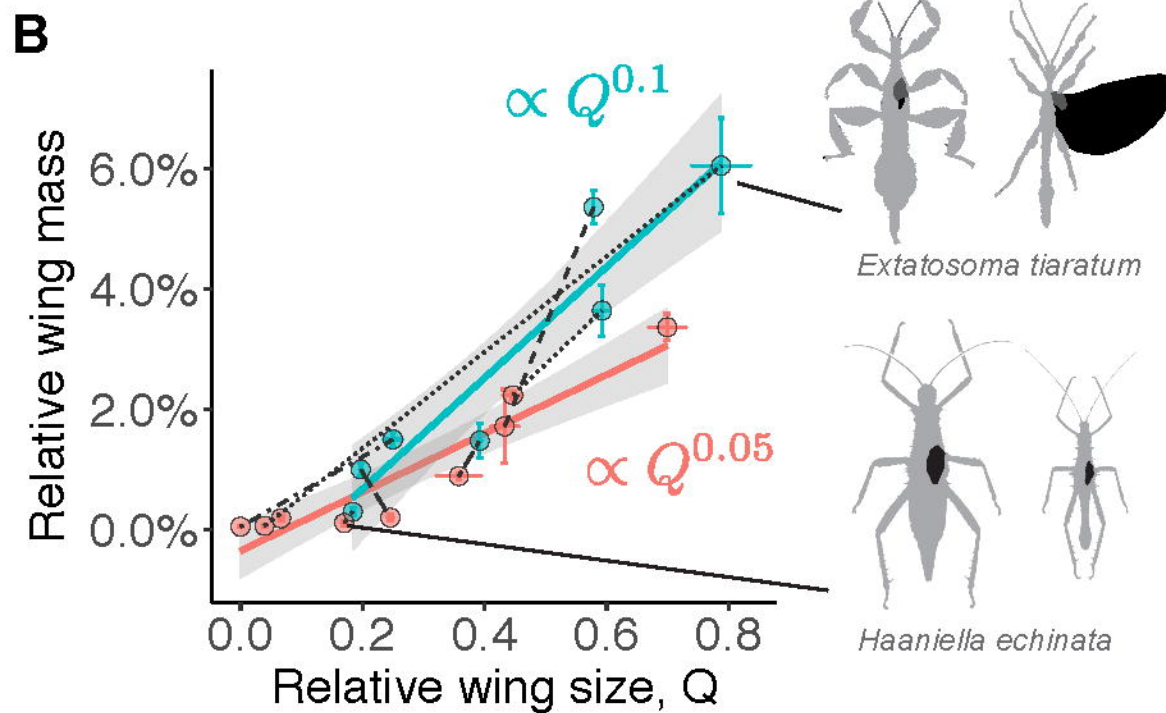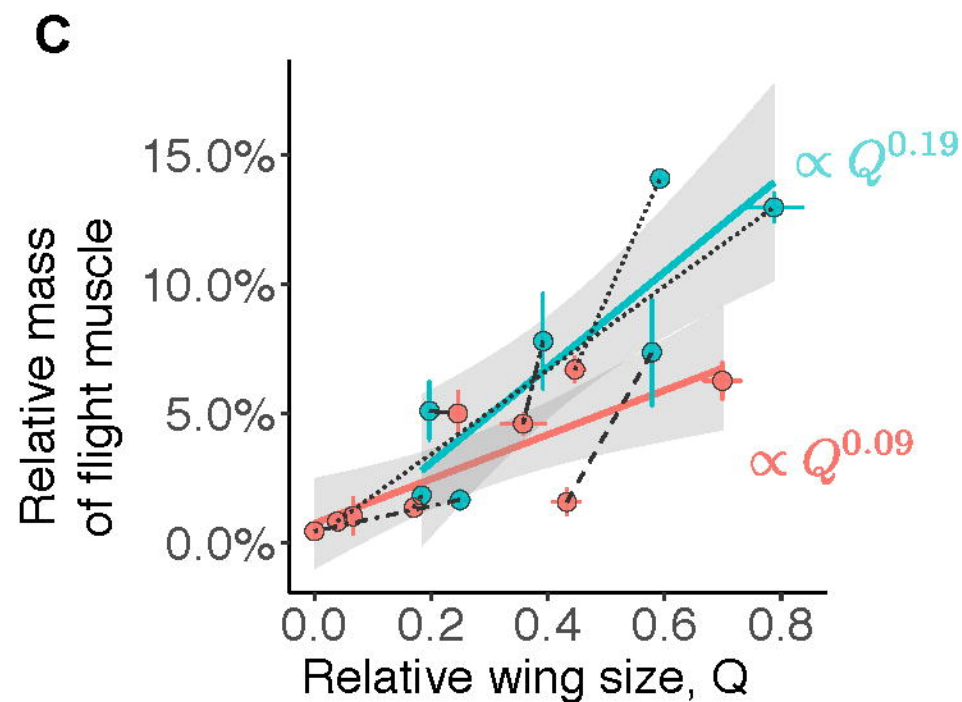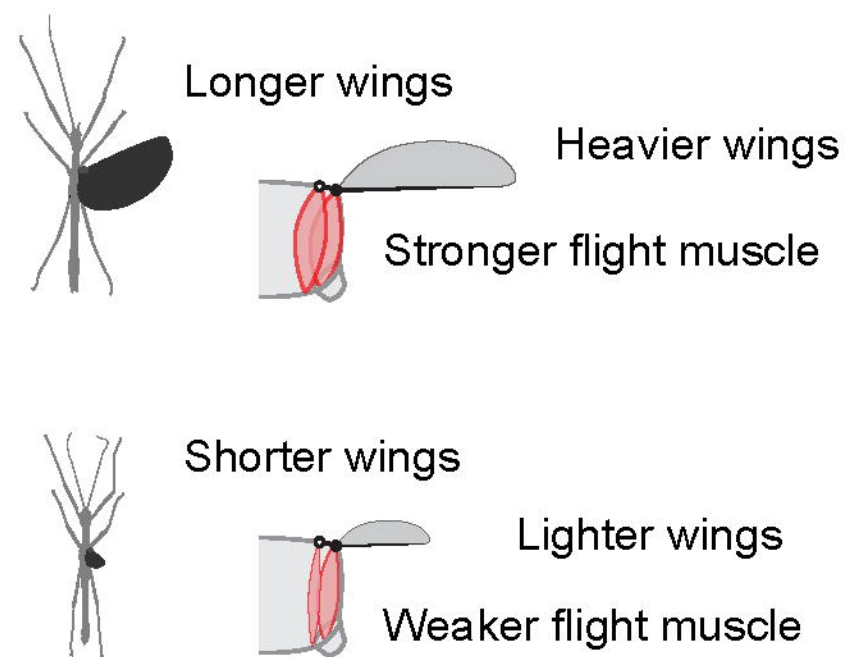

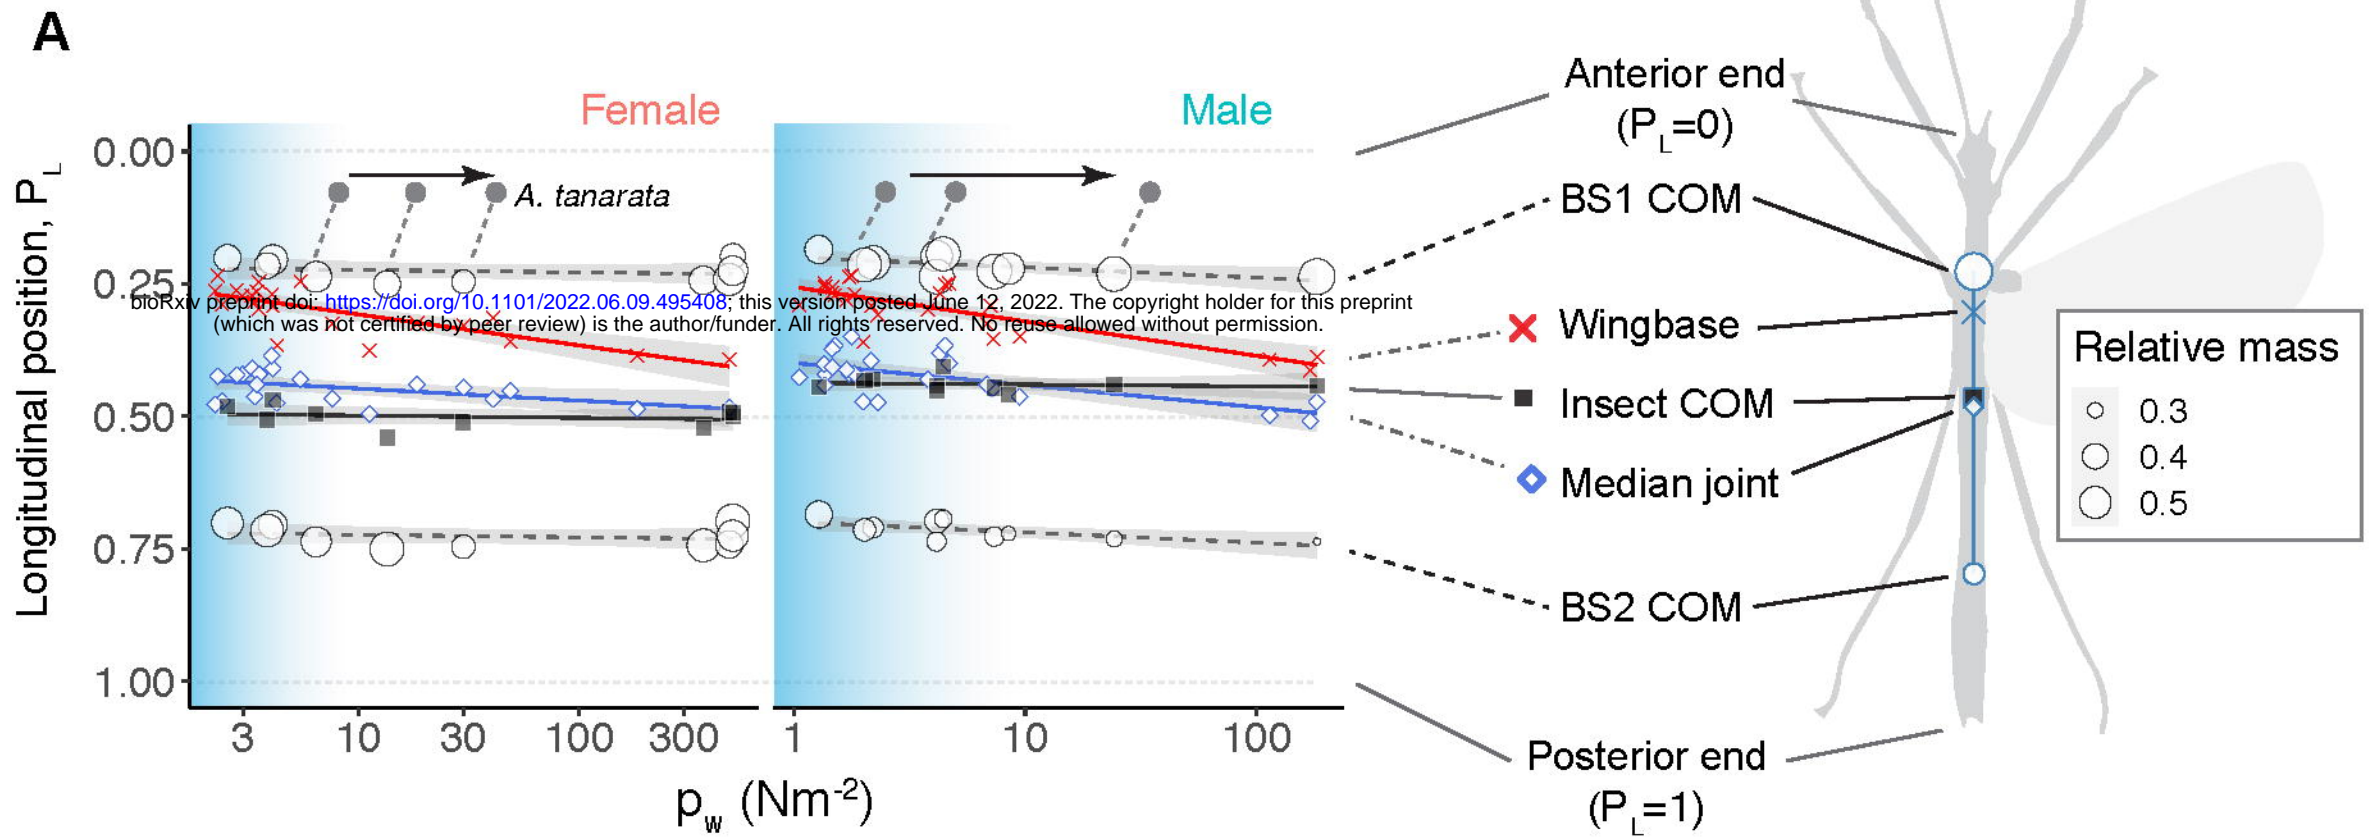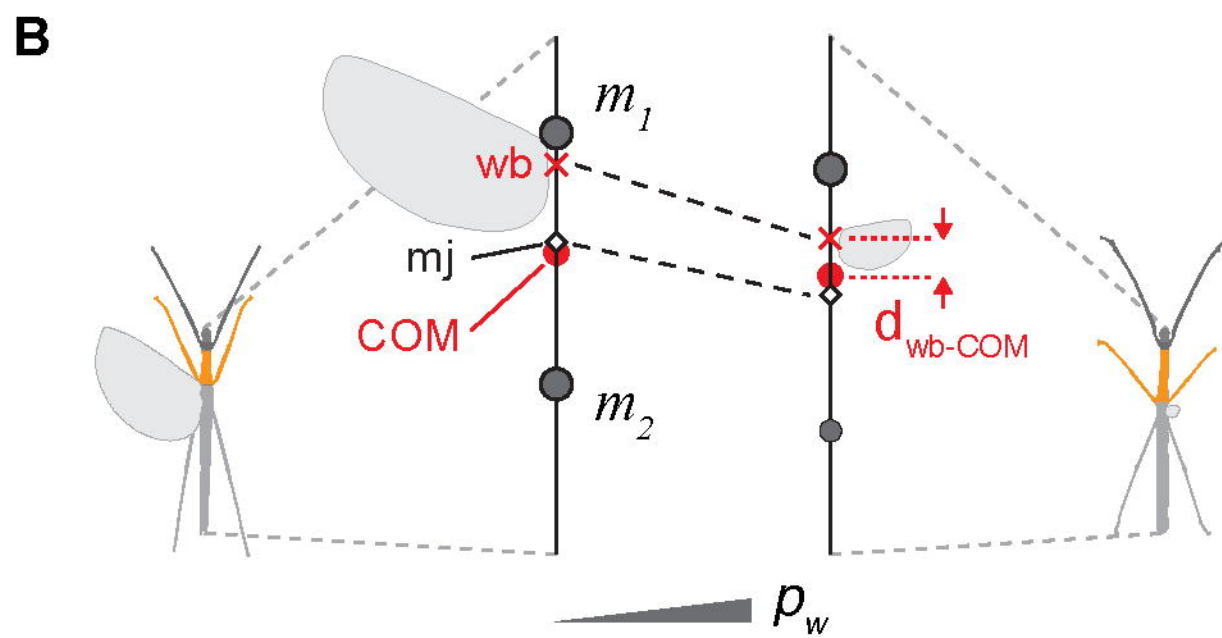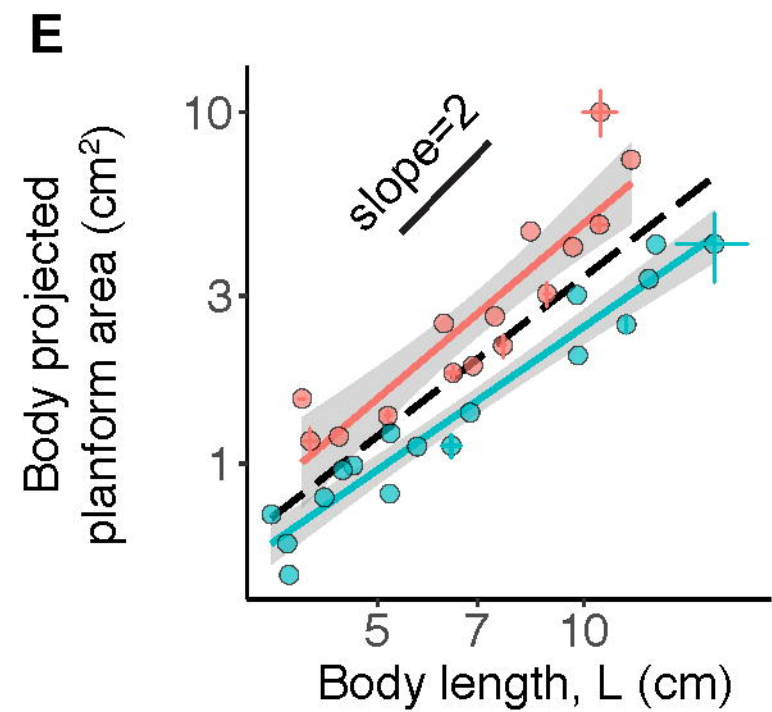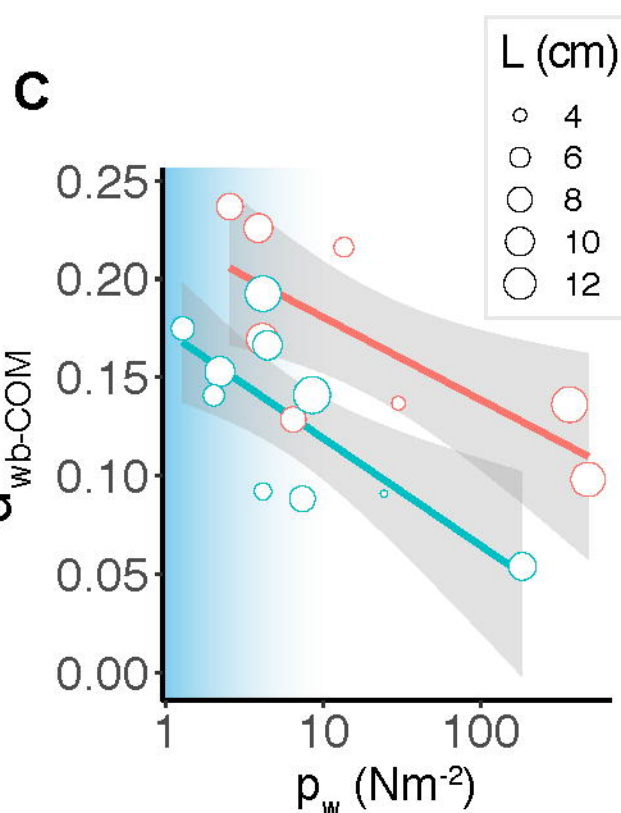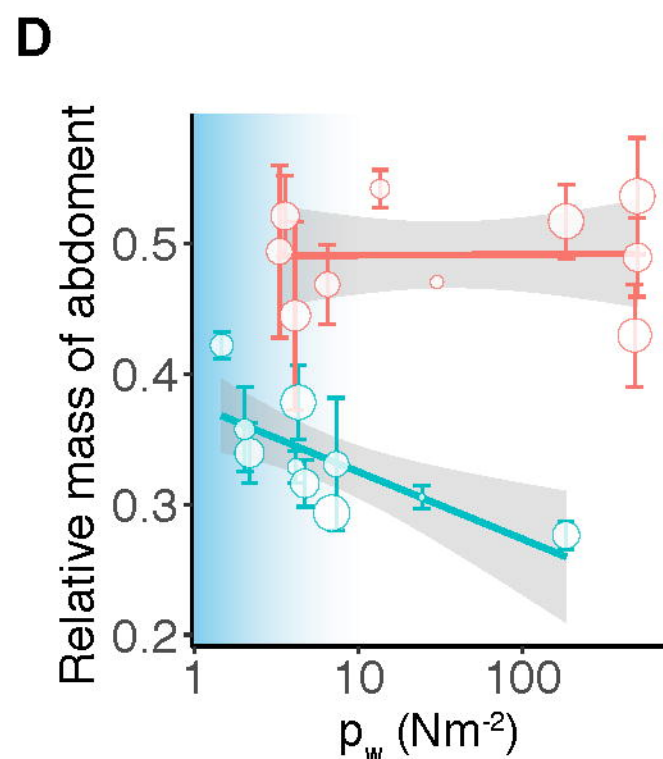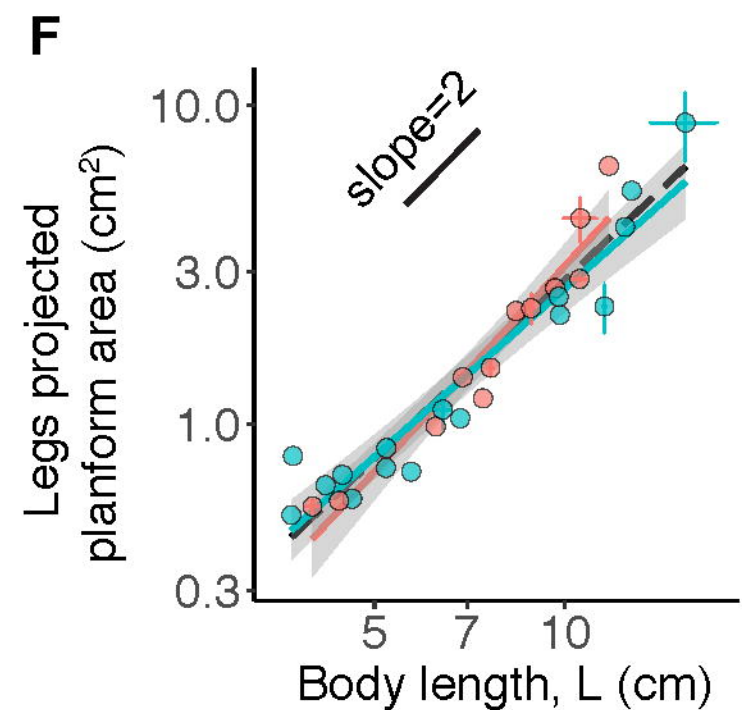



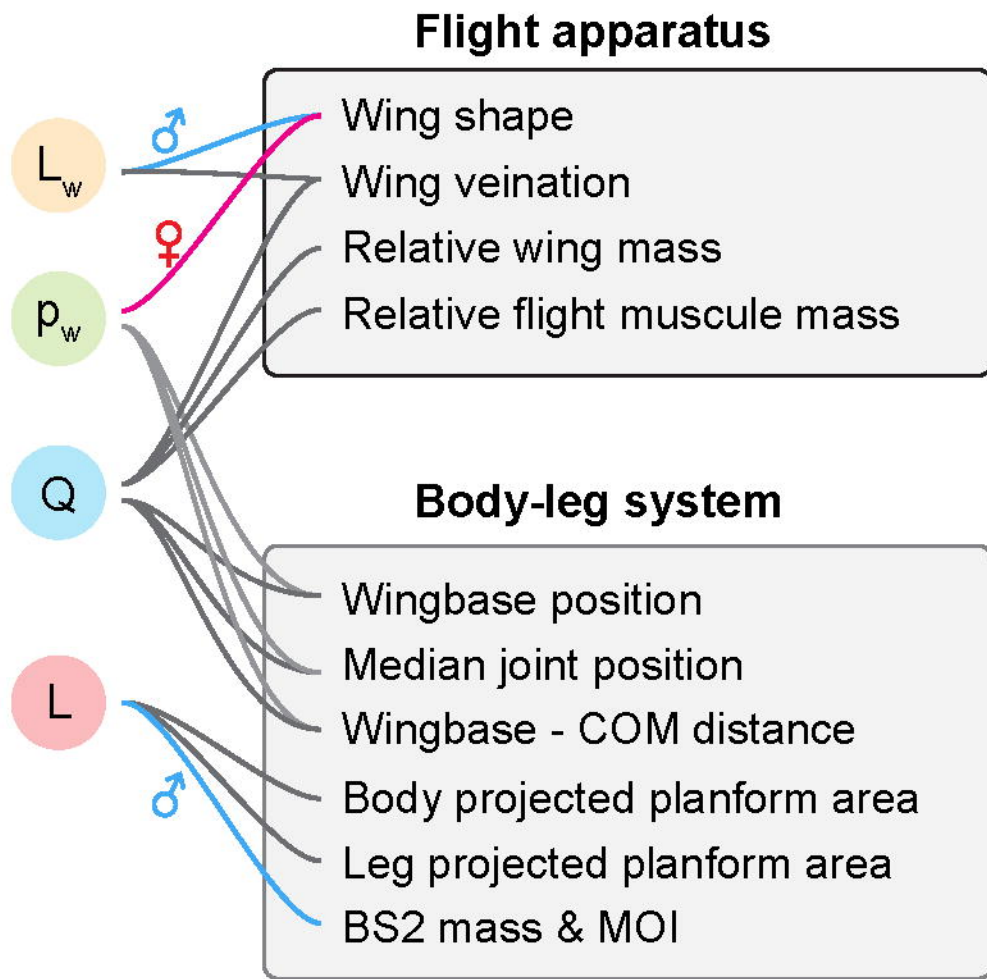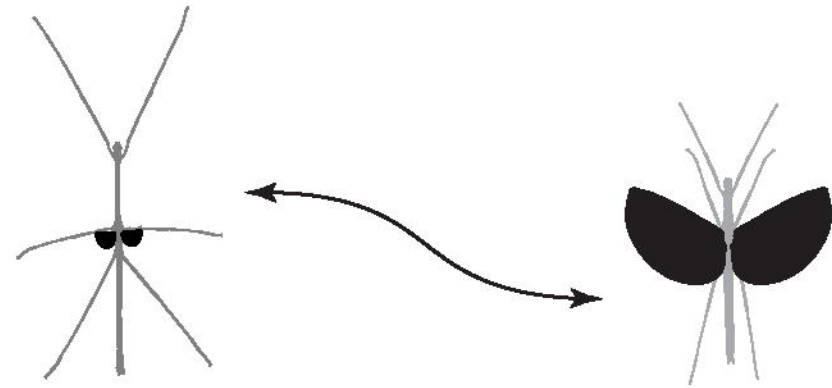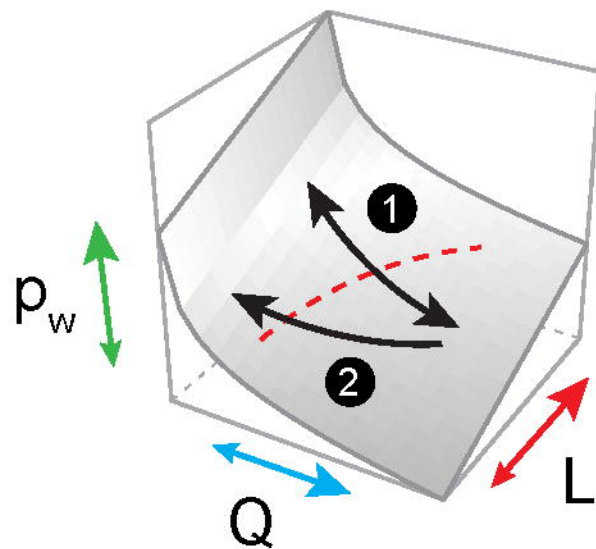

Source: https://www.biorxiv.org/content/10.1101/2022.06.09.495408v1.full.pdf
